# Supplementary material for: Influence of solvents on the morphology of Langmuir and Langmuir–Schaefer films of PCBM and PCBM-based oligomers and polymers
Source: Royal Society of Chemistry journal article supplement (doi:10.1039/d1cp05408b), 2022-01-01
Supplement: d1cp05408b1.pdf [file d1cp05408b1.pdf]

## Influence of the solvents in the morphology of Langmuir and Langmuir-Schaefer films of PCBM and PCBM-based oligomers and polymers

Lucas K. M. Roncaselli, Edilene A. Silva, Maria Luisa Braunger, Hasina H. Ramanitra, Meera Stephen, Lucas V. L. Citolino, José D. Fernandes, André V. S. Simões, Carlos J. L. Constantino, Deuber Lincon Silva Agostini, Didier Bégué, Roger C. Hiorns, Clarissa A. Olivati.

### Supplementary Information

Complementary calculations were carried out under an implicit model of the solvent (PCM model) making it possible to implicitly average the degrees of freedom of the solvent and to treat the electrostatic interactions (generally dominant in the solvation) for the C<sub>60</sub>, PCBM, OPCBMMB and PPCBMB systems. These new calculations show that neither the volumes nor the calculated surfaces are considerably modified whatever the considered solvent, as shown in Tables S1, S2 and S3.

**Table S1:** Area and volume values of OPCBMMB and PPCBMB monomers in solution in chloroform extracted from the theoretical DFT/PCM model

| Materials       | Structural parameters<br>(Å) |       |       | Area in different<br>orientations (Å <sup>2</sup> ) |       |       | Volume<br>(Å <sup>3</sup> ) |
|-----------------|------------------------------|-------|-------|-----------------------------------------------------|-------|-------|-----------------------------|
|                 | X                            | Y     | Z     | X.Y                                                 | Y.Z   | X.Z   | X.Y.Z                       |
| OPCBMMB         | 17.10                        | 18.40 | 11.00 | 314.6                                               | 202.4 | 188.1 | 3461.0                      |
| PPCBMB          | 20.21                        | 18.66 | 13.74 | 377.1                                               | 256.4 | 277.7 | 5181.6                      |
| C <sub>60</sub> | 7.07                         | 7.03  | 6.65  | 49.7                                                | 46.8  | 47.0  | 330.5                       |
| PCBM            | 14.80                        | 9.85  | 6.96  | 145.8                                               | 68.6  | 103.0 | 1014.6                      |

**Table S2:** Area and volume values of OPCBMMB and PPCBMB monomers in solution in toluene extracted from the theoretical DFT/PCM model

| Materials       | Structural parameters<br>(Å) |       |       | Area in different<br>orientations (Å <sup>2</sup> ) |       |       | Volume<br>(Å <sup>3</sup> ) |
|-----------------|------------------------------|-------|-------|-----------------------------------------------------|-------|-------|-----------------------------|
|                 | X                            | Y     | Z     | X.Y                                                 | Y.Z   | X.Z   | X.Y.Z                       |
| OPCBMMB         | 17.19                        | 18.37 | 10.99 | 315.8                                               | 201.9 | 188.9 | 3470.4                      |
| PPCBMB          | 20.19                        | 18.62 | 13.70 | 375.9                                               | 255.1 | 276.6 | 5150.3                      |
| C <sub>60</sub> | 7.06                         | 7.05  | 6.94  | 49.8                                                | 48.9  | 49.0  | 345.2                       |
| PCBM            | 14.80                        | 9.84  | 6.96  | 145.6                                               | 68.5  | 103.0 | 1013.6                      |

**Table S3:** Area and volume values of OPCBMMB and PPCBMB monomers in solution in xylene extracted from the theoretical DFT/PCM model

| Materials       | Structural parameters<br>(Å) |       |       | Area in different<br>orientations (Å <sup>2</sup> ) |       |       | Volume<br>(Å <sup>3</sup> ) |
|-----------------|------------------------------|-------|-------|-----------------------------------------------------|-------|-------|-----------------------------|
|                 | X                            | Y     | Z     | X.Y                                                 | Y.Z   | X.Z   | X.Y.Z                       |
| OPCBMMB         | 17.11                        | 18.41 | 10.98 | 315.0                                               | 202.1 | 187.9 | 3458.7                      |
| PPCBMB          | 20.19                        | 18.62 | 13.70 | 375.9                                               | 255.1 | 276.6 | 5150.3                      |
| C <sub>60</sub> | 7.09                         | 6.97  | 6.78  | 49.4                                                | 47.3  | 48.1  | 335.0                       |
| PCBM            | 14.80                        | 9.85  | 6.96  | 145.8                                               | 68.6  | 103.0 | 1014.6                      |

### Computational Details

Optimisations of geometries and energies were determined at the DFT (Density Functional Theory) level using the B3LYP exchange-correlation functional with the 6-31G\* basis set. Calculations were performed using Gaussian 09 program package.<sup>i</sup>

---

**PCBM** (*singlet*) B3LYP-6-31G\* E= -2902.723357 u.a.

---

|   | X         | Y         | Z         |
|---|-----------|-----------|-----------|
| C | -4.286121 | 2.471941  | 1.093775  |
| C | -3.787332 | 2.282616  | -0.198613 |
| C | -3.895019 | 3.320950  | -1.129730 |
| C | -4.491513 | 4.529837  | -0.776070 |
| C | -4.987590 | 4.712133  | 0.516122  |
| C | -4.884853 | 3.680476  | 1.449638  |
| C | -3.200323 | 0.962943  | -0.619108 |
| C | -4.208159 | 0.007471  | -1.256040 |
| C | -5.230044 | -0.522420 | -0.248643 |
| C | -6.201670 | -1.510531 | -0.888543 |
| C | -7.210452 | -2.051478 | 0.102939  |
| O | -8.061811 | -2.913239 | -0.496927 |
| C | -9.057757 | -3.486662 | 0.364740  |
| C | -1.800333 | 0.988316  | -1.185174 |
| C | -2.138936 | 0.357678  | 0.263652  |
| C | -1.473317 | 1.019043  | 1.422694  |
| C | -0.741008 | 2.188762  | 1.313186  |
| C | -0.431564 | 2.766396  | -0.010035 |
| C | -0.867422 | 2.152959  | -1.172528 |
| C | -1.831965 | -1.094732 | 0.418264  |
| C | -1.422645 | -1.901814 | -0.631294 |
| C | -1.110245 | -1.323724 | -1.954919 |
| C | -1.220107 | 0.039302  | -2.178669 |

|   |           |           |           |
|---|-----------|-----------|-----------|
| C | -0.177125 | 0.724259  | -2.905716 |
| C | 0.038459  | 2.020830  | -2.288650 |
| C | -1.266261 | -1.300550 | 1.731608  |
| C | -1.048706 | -0.003816 | 2.347534  |
| C | 0.046867  | 0.195145  | 3.191005  |
| C | 0.798359  | 1.426066  | 3.097122  |
| C | 0.415791  | 2.395599  | 2.164375  |
| C | 1.432210  | 3.093312  | 1.394084  |
| C | 0.910234  | 3.316117  | 0.055577  |
| C | 1.770045  | 3.234307  | -1.044422 |
| C | 1.322613  | 2.569130  | -2.247047 |
| C | 0.899190  | 0.024962  | -3.456284 |
| C | 0.998768  | -1.402311 | -3.248617 |
| C | 0.016791  | -2.058086 | -2.499745 |
| C | 0.404719  | -3.079107 | -1.540854 |
| C | -0.478965 | -2.978524 | -0.390990 |
| C | 0.026401  | -3.209915 | 0.892121  |
| C | -0.377400 | -2.348545 | 1.980679  |
| C | 0.771247  | -2.138620 | 2.849758  |
| C | 0.978817  | -0.894061 | 3.441843  |
| C | 2.316888  | -0.328114 | 3.500288  |
| C | 2.204793  | 1.107887  | 3.286429  |
| C | 3.176708  | 1.778291  | 2.544158  |
| C | 2.782026  | 2.796607  | 1.581500  |
| C | 3.671944  | 2.699421  | 0.433570  |
| C | 3.175832  | 2.914546  | -0.852006 |
| C | 3.594646  | 2.049063  | -1.945462 |
| C | 2.446013  | 1.835358  | -2.810861 |
| C | 2.239075  | 0.590786  | -3.403108 |
| C | 2.402797  | -1.731301 | -3.061307 |
| C | 3.170764  | -0.497944 | -3.157004 |
| C | 4.272727  | -0.295369 | -2.325184 |
| C | 4.656284  | -1.318459 | -1.365796 |
| C | 3.921673  | -2.501709 | -1.276327 |
| C | 2.771567  | -2.710482 | -2.139006 |
| C | 5.111587  | -0.651913 | -0.155239 |
| C | 4.818265  | -1.197350 | 1.094425  |
| C | 4.056705  | -2.433534 | 1.188903  |
| C | 3.615393  | -3.071310 | 0.028669  |
| C | 4.406824  | -0.331284 | 2.188713  |
| C | 4.300325  | 1.045556  | 1.986301  |
| C | 4.606530  | 1.615093  | 0.681334  |
| C | 5.006279  | 0.783803  | -0.366030 |
| C | 4.489084  | 1.004818  | -1.706770 |
| C | 3.393913  | -1.032652 | 2.960822  |
| C | 3.177177  | -2.332747 | 2.342399  |
| C | 1.892362  | -2.874827 | 2.288683  |
| C | 1.431224  | -3.537751 | 1.077088  |
| C | 2.276174  | -3.631583 | -0.028598 |
| C | 1.750287  | -3.402675 | -1.366416 |
| O | -7.265346 | -1.766416 | 1.279554  |
| H | -4.198731 | 1.673088  | 1.823542  |
| H | -5.267316 | 3.815325  | 2.457198  |
| H | -5.448906 | 5.655261  | 0.794594  |
| H | -4.564193 | 5.330320  | -1.506745 |
| H | -3.499165 | 3.180593  | -2.131861 |
| H | -8.586340 | -4.049858 | 1.174450  |
| H | -9.686780 | -2.704516 | 0.797951  |
| H | -9.648638 | -4.147545 | -0.269734 |
| H | -6.753625 | -1.048712 | -1.717620 |

|   |           |           |           |
|---|-----------|-----------|-----------|
| H | -5.668596 | -2.363845 | -1.328312 |
| H | -5.791873 | 0.305230  | 0.195184  |
| H | -4.707410 | -1.016641 | 0.578305  |
| H | -3.683371 | -0.832758 | -1.720280 |
| H | -4.715075 | 0.546022  | -2.066854 |

---

PCBM xylene (*singlet*) B3LYP-6-31G\* E= -2902.727044 u.a.

---

|   | X         | Y         | Z         |
|---|-----------|-----------|-----------|
| C | -4.280709 | 2.476743  | 1.094921  |
| C | -3.786520 | 2.283885  | -0.198904 |
| C | -3.897367 | 3.319544  | -1.133025 |
| C | -4.491957 | 4.530029  | -0.780293 |
| C | -4.982960 | 4.716374  | 0.513703  |
| C | -4.877540 | 3.686906  | 1.449865  |
| C | -3.200791 | 0.962973  | -0.618005 |
| C | -4.209376 | 0.007203  | -1.253291 |
| C | -5.231812 | -0.519374 | -0.244574 |
| C | -6.201282 | -1.510047 | -0.883540 |
| C | -7.214061 | -2.049420 | 0.103674  |
| O | -8.054893 | -2.919772 | -0.493931 |
| C | -9.058746 | -3.495095 | 0.360461  |
| C | -1.801189 | 0.987390  | -1.184864 |
| C | -2.139059 | 0.358527  | 0.265088  |
| C | -1.472102 | 1.020775  | 1.422637  |
| C | -0.739877 | 2.190422  | 1.311774  |
| C | -0.431059 | 2.766447  | -0.012357 |
| C | -0.867691 | 2.151446  | -1.173785 |
| C | -1.831884 | -1.093628 | 0.421030  |
| C | -1.423325 | -1.902085 | -0.627696 |
| C | -1.111569 | -1.325643 | -1.952084 |
| C | -1.221274 | 0.037114  | -2.177144 |
| C | -0.178514 | 0.720877  | -2.905606 |
| C | 0.037709  | 2.018013  | -2.290116 |
| C | -1.265369 | -1.298230 | 1.734205  |
| C | -1.047185 | -0.000926 | 2.348531  |
| C | 0.048697  | 0.198777  | 3.191440  |
| C | 0.800398  | 1.429434  | 3.095800  |
| C | 0.417504  | 2.397876  | 2.161996  |
| C | 1.433651  | 3.094436  | 1.390353  |
| C | 0.910952  | 3.315826  | 0.051902  |
| C | 1.770216  | 3.232797  | -1.048467 |
| C | 1.321940  | 2.566282  | -2.250033 |
| C | 0.897321  | 0.020848  | -3.456250 |
| C | 0.996770  | -1.406190 | -3.247002 |
| C | 0.015065  | -2.060721 | -2.496624 |
| C | 0.403369  | -3.080733 | -1.536797 |
| C | -0.479702 | -2.978603 | -0.386607 |
| C | 0.026215  | -3.209008 | 0.896496  |
| C | -0.376822 | -2.346285 | 1.984261  |
| C | 0.772378  | -2.135523 | 2.852416  |
| C | 0.980553  | -0.890336 | 3.443004  |
| C | 2.318780  | -0.324631 | 3.500007  |
| C | 2.206851  | 1.111171  | 3.284571  |
| C | 3.178567  | 1.780547  | 2.541060  |

|   |           |           |           |
|---|-----------|-----------|-----------|
| C | 2.783577  | 2.797826  | 1.577455  |
| C | 3.672824  | 2.699140  | 0.429166  |
| C | 3.176013  | 2.912918  | -0.856392 |
| C | 3.594035  | 2.046053  | -1.949080 |
| C | 2.444898  | 1.831678  | -2.813643 |
| C | 2.237350  | 0.586453  | -3.404322 |
| C | 2.400804  | -1.735249 | -3.059934 |
| C | 3.168976  | -0.502155 | -3.157425 |
| C | 4.271503  | -0.298886 | -2.326486 |
| C | 4.655376  | -1.320963 | -1.366152 |
| C | 3.920547  | -2.503952 | -1.274956 |
| C | 2.769946  | -2.713526 | -2.136789 |
| C | 5.111484  | -0.653143 | -0.156601 |
| C | 4.818761  | -1.197097 | 1.093867  |
| C | 4.056956  | -2.432997 | 1.190144  |
| C | 3.614845  | -3.071976 | 0.030869  |
| C | 4.408076  | -0.329694 | 2.187387  |
| C | 4.301735  | 1.046940  | 1.983442  |
| C | 4.607357  | 1.614926  | 0.677654  |
| C | 5.006397  | 0.782357  | -0.368979 |
| C | 4.488453  | 1.001935  | -1.709674 |
| C | 3.395426  | -1.029987 | 2.960829  |
| C | 3.178064  | -2.330701 | 2.343974  |
| C | 1.893069  | -2.872524 | 2.291539  |
| C | 1.431110  | -3.536775 | 1.080971  |
| C | 2.275504  | -3.632076 | -0.025047 |
| C | 1.748950  | -3.404582 | -1.362828 |
| O | -7.280216 | -1.754839 | 1.279293  |
| H | -4.191752 | 1.679954  | 1.826771  |
| H | -5.256292 | 3.824662  | 2.458391  |
| H | -5.442679 | 5.660498  | 0.791286  |
| H | -4.567378 | 5.328272  | -1.513061 |
| H | -3.507058 | 3.176022  | -2.136835 |
| H | -8.592709 | -4.052904 | 1.176612  |
| H | -9.697154 | -2.713812 | 0.780498  |
| H | -9.638519 | -4.162007 | -0.277345 |
| H | -6.750340 | -1.049979 | -1.715318 |
| H | -5.665958 | -2.364017 | -1.318766 |
| H | -5.794138 | 0.310556  | 0.194345  |
| H | -4.708694 | -1.010245 | 0.584175  |
| H | -3.686128 | -0.835082 | -1.715240 |
| H | -4.715686 | 0.544197  | -2.065140 |

---

**PCBM** toluene (*singlet*) B3LYP-6-31G\* E= -2902.727024 u.a.

---

|   | X         | Y         | Z         |
|---|-----------|-----------|-----------|
| C | -4.280700 | 2.476808  | 1.094915  |
| C | -3.786503 | 2.283961  | -0.198911 |
| C | -3.897296 | 3.319650  | -1.133001 |
| C | -4.491828 | 4.530153  | -0.780241 |
| C | -4.982828 | 4.716487  | 0.513754  |
| C | -4.877473 | 3.686986  | 1.449886  |
| C | -3.200819 | 0.963052  | -0.618028 |
| C | -4.209354 | 0.007278  | -1.253387 |
| C | -5.231756 | -0.519400 | -0.244701 |

|   |           |           |           |
|---|-----------|-----------|-----------|
| C | -6.201143 | -1.510181 | -0.883670 |
| C | -7.213901 | -2.049513 | 0.103618  |
| O | -8.054709 | -2.919961 | -0.493868 |
| C | -9.058553 | -3.495159 | 0.360621  |
| C | -1.801187 | 0.987442  | -1.184878 |
| C | -2.139097 | 0.358539  | 0.265057  |
| C | -1.472141 | 1.020752  | 1.422632  |
| C | -0.739903 | 2.190391  | 1.311804  |
| C | -0.431067 | 2.766455  | -0.012303 |
| C | -0.867687 | 2.151492  | -1.173753 |
| C | -1.831938 | -1.093624 | 0.420970  |
| C | -1.423350 | -1.902040 | -0.627777 |
| C | -1.111574 | -1.325566 | -1.952144 |
| C | -1.221276 | 0.037193  | -2.177184 |
| C | -0.178496 | 0.720971  | -2.905609 |
| C | 0.037727  | 2.018085  | -2.290080 |
| C | -1.265433 | -1.298263 | 1.734145  |
| C | -1.047245 | -0.000978 | 2.348506  |
| C | 0.048628  | 0.198695  | 3.191433  |
| C | 0.800339  | 1.429349  | 3.095834  |
| C | 0.417466  | 2.397817  | 2.162051  |
| C | 1.433626  | 3.094394  | 1.390440  |
| C | 0.910948  | 3.315825  | 0.051989  |
| C | 1.770225  | 3.232821  | -1.048369 |
| C | 1.321961  | 2.566342  | -2.249961 |
| C | 0.897341  | 0.020948  | -3.456254 |
| C | 0.996777  | -1.406097 | -3.247041 |
| C | 0.015060  | -2.060641 | -2.496692 |
| C | 0.403342  | -3.080684 | -1.536891 |
| C | -0.479744 | -2.978579 | -0.386708 |
| C | 0.026153  | -3.209021 | 0.896394  |
| C | -0.376892 | -2.346327 | 1.984179  |
| C | 0.772298  | -2.135600 | 2.852354  |
| C | 0.980474  | -0.890430 | 3.442979  |
| C | 2.318705  | -0.324735 | 3.500016  |
| C | 2.206789  | 1.111071  | 3.284618  |
| C | 3.178517  | 1.780462  | 2.541135  |
| C | 2.783546  | 2.797769  | 1.577552  |
| C | 3.672806  | 2.699108  | 0.429274  |
| C | 3.176014  | 2.912925  | -0.856284 |
| C | 3.594047  | 2.046087  | -1.948988 |
| C | 2.444921  | 1.831747  | -2.813574 |
| C | 2.237373  | 0.586540  | -3.404289 |
| C | 2.400806  | -1.735171 | -3.059963 |
| C | 3.168989  | -0.502082 | -3.157413 |
| C | 4.271503  | -0.298844 | -2.326450 |
| C | 4.655360  | -1.320951 | -1.366144 |
| C | 3.920516  | -2.503934 | -1.274988 |
| C | 2.769927  | -2.713478 | -2.136841 |
| C | 5.111455  | -0.653168 | -0.156565 |
| C | 4.818703  | -1.197151 | 1.093879  |
| C | 4.056891  | -2.433049 | 1.190116  |
| C | 3.614792  | -3.071994 | 0.030817  |
| C | 4.408014  | -0.329777 | 2.187421  |
| C | 4.301684  | 1.046863  | 1.983513  |
| C | 4.607325  | 1.614879  | 0.677743  |
| C | 5.006381  | 0.782341  | -0.368906 |
| C | 4.488458  | 1.001960  | -1.709602 |
| C | 3.395352  | -1.030083 | 2.960830  |
| C | 3.177989  | -2.330780 | 2.343934  |

|   |           |           |           |
|---|-----------|-----------|-----------|
| C | 1.892990  | -2.872594 | 2.291470  |
| C | 1.431044  | -3.536807 | 1.080880  |
| C | 2.275451  | -3.632084 | -0.025131 |
| C | 1.748917  | -3.404548 | -1.362914 |
| O | -7.280007 | -1.754805 | 1.279220  |
| H | -4.191817 | 1.679977  | 1.826727  |
| H | -5.256232 | 3.824731  | 2.458411  |
| H | -5.442497 | 5.660628  | 0.791361  |
| H | -4.567200 | 5.328424  | -1.512985 |
| H | -3.506977 | 3.176135  | -2.136808 |
| H | -8.592506 | -4.053141 | 1.176651  |
| H | -9.696720 | -2.713781 | 0.780845  |
| H | -9.638551 | -4.161889 | -0.277171 |
| H | -6.750189 | -1.050202 | -1.715495 |
| H | -5.665717 | -2.364146 | -1.318784 |
| H | -5.794178 | 0.310458  | 0.194220  |
| H | -4.708628 | -1.010247 | 0.584050  |
| H | -3.686050 | -0.834952 | -1.715366 |
| H | -4.715682 | 0.544281  | -2.065227 |

---

**PCBM** chloroform (*singlet*) B3LYP-6-31G\* E= -2902.729043 u.a.

---

|   | X         | Y         | Z         |
|---|-----------|-----------|-----------|
| C | -4.276108 | 2.480435  | 1.096571  |
| C | -3.786131 | 2.284237  | -0.198496 |
| C | -3.900290 | 3.317406  | -1.135232 |
| C | -4.493730 | 4.529000  | -0.783569 |
| C | -4.980206 | 4.718966  | 0.511873  |
| C | -4.871679 | 3.691778  | 1.450500  |
| C | -3.201130 | 0.962500  | -0.616257 |
| C | -4.210068 | 0.006358  | -1.250401 |
| C | -5.232449 | -0.519016 | -0.240954 |
| C | -6.202695 | -1.508518 | -0.880588 |
| C | -7.216578 | -2.048794 | 0.104362  |
| O | -8.055422 | -2.919047 | -0.493641 |
| C | -9.062345 | -3.496607 | 0.357089  |
| C | -1.801876 | 0.986138  | -1.183978 |
| C | -2.138868 | 0.358963  | 0.266954  |
| C | -1.470714 | 1.022313  | 1.423059  |
| C | -0.738651 | 2.191923  | 1.310604  |
| C | -0.430738 | 2.766490  | -0.014436 |
| C | -0.868170 | 2.149922  | -1.174776 |
| C | -1.831588 | -1.092982 | 0.424300  |
| C | -1.423733 | -1.902611 | -0.623718 |
| C | -1.112869 | -1.327743 | -1.948924 |
| C | -1.222604 | 0.034716  | -2.175413 |
| C | -0.180288 | 0.717474  | -2.905386 |
| C | 0.036521  | 2.015208  | -2.291510 |
| C | -1.264084 | -1.296181 | 1.737249  |
| C | -1.045303 | 0.001747  | 2.349919  |
| C | 0.051072  | 0.202333  | 3.191980  |
| C | 0.802833  | 1.432795  | 3.094427  |
| C | 0.419383  | 2.400181  | 2.159738  |
| C | 1.435045  | 3.095766  | 1.386621  |
| C | 0.911441  | 3.315701  | 0.048301  |

|   |           |           |           |
|---|-----------|-----------|-----------|
| C | 1.769960  | 3.231422  | -1.052569 |
| C | 1.320760  | 2.563537  | -2.253041 |
| C | 0.895064  | 0.016792  | -3.456137 |
| C | 0.994549  | -1.410003 | -3.245296 |
| C | 0.013313  | -2.063484 | -2.493379 |
| C | 0.402229  | -3.082428 | -1.532669 |
| C | -0.480048 | -2.978878 | -0.382011 |
| C | 0.026636  | -3.208118 | 0.901004  |
| C | -0.375583 | -2.344111 | 1.988048  |
| C | 0.774266  | -2.132384 | 2.855106  |
| C | 0.982983  | -0.886568 | 3.444185  |
| C | 2.321300  | -0.320929 | 3.499611  |
| C | 2.209361  | 1.114642  | 3.282583  |
| C | 3.180661  | 1.783100  | 2.537668  |
| C | 2.785110  | 2.799310  | 1.573177  |
| C | 3.673528  | 2.699220  | 0.424408  |
| C | 3.175829  | 2.911589  | -0.861053 |
| C | 3.593003  | 2.043406  | -1.953028 |
| C | 2.443274  | 1.828221  | -2.816587 |
| C | 2.235171  | 0.582324  | -3.405644 |
| C | 2.398648  | -1.738952 | -3.058684 |
| C | 3.166880  | -0.506066 | -3.158121 |
| C | 4.270043  | -0.301977 | -2.328216 |
| C | 4.654486  | -1.322992 | -1.366990 |
| C | 3.919597  | -2.505802 | -1.273964 |
| C | 2.768393  | -2.716277 | -2.134765 |
| C | 5.111485  | -0.653848 | -0.158514 |
| C | 4.819586  | -1.196346 | 1.092778  |
| C | 4.057711  | -2.432047 | 1.190974  |
| C | 3.614725  | -3.072297 | 0.032725  |
| C | 4.409715  | -0.327655 | 2.185581  |
| C | 4.303360  | 1.048754  | 1.980123  |
| C | 4.608157  | 1.615225  | 0.673489  |
| C | 5.006399  | 0.781421  | -0.372459 |
| C | 4.487509  | 0.999499  | -1.713030 |
| C | 3.397531  | -1.026974 | 2.960500  |
| C | 3.179597  | -2.328331 | 2.345233  |
| C | 1.894520  | -2.870105 | 2.294302  |
| C | 1.431654  | -3.535727 | 1.084842  |
| C | 2.275309  | -3.632328 | -0.021644 |
| C | 1.747874  | -3.406335 | -1.359321 |
| O | -7.285216 | -1.754190 | 1.280898  |
| H | -4.184875 | 1.685632  | 1.830308  |
| H | -5.246980 | 3.832264  | 2.459935  |
| H | -5.438969 | 5.663809  | 0.788493  |
| H | -4.572037 | 5.325093  | -1.518325 |
| H | -3.514303 | 3.171064  | -2.140266 |
| H | -8.598254 | -4.054274 | 1.174273  |
| H | -9.704131 | -2.716301 | 0.773466  |
| H | -9.638196 | -4.164332 | -0.283113 |
| H | -6.750893 | -1.046631 | -1.711797 |
| H | -5.667519 | -2.362171 | -1.316339 |
| H | -5.793773 | 0.312022  | 0.197313  |
| H | -4.708824 | -1.010293 | 0.587309  |
| H | -3.687494 | -0.836778 | -1.711349 |
| H | -4.716339 | 0.542399  | -2.062692 |



---

C<sub>60</sub> (singlet) B3LYP-6-31G\* E= -2286.490447 u.a.

---

|   | X         | Y         | Z         |
|---|-----------|-----------|-----------|
| C | 1.200991  | 3.341882  | -0.060487 |
| C | 1.140084  | 3.097584  | 1.311336  |
| C | 2.064756  | 2.156155  | 1.924163  |
| C | 3.012398  | 1.498131  | 1.140043  |
| C | 3.075534  | 1.752621  | -0.291027 |
| C | 2.189044  | 2.655458  | -0.878561 |
| C | 1.345589  | 1.429447  | 2.959379  |
| C | 1.603776  | 0.074863  | 3.167704  |
| C | 2.591964  | -0.611708 | 2.349739  |
| C | 3.281437  | 0.084952  | 1.357283  |
| C | 0.504216  | -0.845829 | 3.412147  |
| C | -0.808435 | -0.373761 | 3.437670  |
| C | -1.077487 | 1.039206  | 3.220088  |
| C | -0.023260 | 1.921788  | 2.986372  |
| C | -1.868674 | -1.137112 | 2.797542  |
| C | -1.572784 | -2.340955 | 2.158717  |
| C | -0.204079 | -2.833049 | 2.131940  |
| C | 0.812551  | -2.101392 | 2.745322  |
| C | 2.102842  | -1.956784 | 2.088633  |
| C | -2.304167 | 1.149410  | 2.445558  |
| C | -2.793474 | -0.195796 | 2.184364  |
| C | -3.384509 | -0.497190 | 0.957569  |
| C | -3.075982 | -1.752938 | 0.290768  |
| C | -2.189066 | -2.655591 | 0.878876  |
| C | -1.200890 | -3.342318 | 0.061206  |
| C | 0.025785  | -3.452389 | 0.835608  |
| C | 1.263006  | -3.313990 | 0.206031  |
| C | 2.322972  | -2.549724 | 0.845676  |
| C | -2.425955 | 2.138036  | 1.469296  |
| C | -1.326553 | 3.059011  | 1.225541  |
| C | -0.150371 | 2.952931  | 1.967899  |
| C | 3.510920  | -0.533612 | 0.060539  |
| C | 3.041947  | -1.823486 | -0.189689 |
| C | -3.041957 | 1.823684  | 0.189286  |
| C | -3.511237 | 0.533684  | -0.061250 |
| C | -3.281809 | -0.085116 | -1.357881 |
| C | -3.012488 | -1.498076 | -1.140234 |
| C | -2.064568 | -2.156190 | -1.923939 |
| C | -1.139798 | -3.097478 | -1.310588 |
| C | 0.150157  | -2.953204 | -1.967199 |
| C | 1.326392  | -3.058710 | -1.224774 |
| C | 2.426154  | -2.137917 | -1.469643 |
| C | 3.384445  | 0.497176  | -0.958329 |
| C | -0.025775 | 3.452442  | -0.834948 |
| C | -1.263053 | 3.313949  | -0.205641 |
| C | -2.323162 | 2.550426  | -0.845807 |
| C | -2.102478 | 1.956932  | -2.088572 |
| C | -2.591887 | 0.611638  | -2.350189 |
| C | -1.604058 | -0.074955 | -3.167856 |
| C | -1.346041 | -1.430022 | -2.959404 |
| C | 0.023178  | -1.922333 | -2.986190 |
| C | 1.077549  | -1.039573 | -3.220301 |
| C | 2.304760  | -1.149705 | -2.446664 |

|   |           |          |           |
|---|-----------|----------|-----------|
| C | 2.793144  | 0.195787 | -2.185052 |
| C | 1.573219  | 2.341249 | -2.158598 |
| C | 1.869293  | 1.137606 | -2.798503 |
| C | 0.808284  | 0.374021 | -3.437476 |
| C | -0.504018 | 0.845911 | -3.411718 |
| C | -0.812529 | 2.101653 | -2.744807 |
| C | 0.204156  | 2.833273 | -2.130970 |

---

**C<sub>60</sub>** xylene (*singlet*) B3LYP-6-31G\* E= -2286.490889 u.a.

---

|   | X         | Y         | Z         |
|---|-----------|-----------|-----------|
| C | 3.192563  | -0.399102 | -1.504282 |
| C | 3.066355  | -1.600711 | -0.807353 |
| C | 2.090796  | -2.591252 | -1.236266 |
| C | 1.282173  | -2.339497 | -2.344509 |
| C | 1.414027  | -1.086142 | -3.071462 |
| C | 2.349040  | -0.136451 | -2.660193 |
| C | 1.523481  | -3.208110 | -0.046954 |
| C | 0.170948  | -3.547492 | -0.015050 |
| C | -0.672588 | -3.285072 | -1.171157 |
| C | -0.128654 | -2.693699 | -2.311240 |
| C | -0.615180 | -3.292166 | 1.182286  |
| C | -0.016326 | -2.707792 | 2.298264  |
| C | 1.394387  | -2.353528 | 2.264838  |
| C | 2.148097  | -2.598474 | 1.117078  |
| C | -0.720926 | -1.677914 | 3.046281  |
| C | -1.995252 | -1.274777 | 2.647416  |
| C | -2.619997 | -1.884337 | 1.483428  |
| C | -1.944384 | -2.871625 | 0.766256  |
| C | -1.979928 | -2.867331 | -0.688274 |
| C | 1.561801  | -1.104773 | 2.992356  |
| C | 0.254437  | -0.687115 | 3.475177  |
| C | -0.084824 | 0.665694  | 3.487494  |
| C | -1.414038 | 1.086165  | 3.071472  |
| C | -2.348964 | 0.136487  | 2.660157  |
| C | -3.192585 | 0.399112  | 1.504260  |
| C | -3.359952 | -0.849761 | 0.776871  |
| C | -3.393808 | -0.845430 | -0.617490 |
| C | -2.689286 | -1.875526 | -1.365517 |
| C | 2.475863  | -0.152425 | 2.541850  |
| C | 3.262066  | -0.407864 | 1.344584  |
| C | 3.101705  | -1.605131 | 0.647207  |
| C | -0.868626 | -1.659210 | -3.017656 |
| C | -2.122036 | -1.258833 | -2.554872 |
| C | 2.121961  | 1.258783  | 2.554898  |
| C | 0.868641  | 1.659203  | 3.017741  |
| C | 0.128607  | 2.693678  | 2.311304  |
| C | -1.282145 | 2.339557  | 2.344565  |
| C | -2.090754 | 2.591364  | 1.236218  |
| C | -3.066258 | 1.600702  | 0.807245  |
| C | -3.101649 | 1.605174  | -0.647206 |
| C | -3.262095 | 0.407832  | -1.344576 |
| C | -2.475829 | 0.152385  | -2.541828 |
| C | 0.084828  | -0.665748 | -3.487631 |
| C | 3.359961  | 0.849882  | -0.776889 |

|   |           |          |           |
|---|-----------|----------|-----------|
| C | 3.393775  | 0.845533 | 0.617471  |
| C | 2.689296  | 1.875494 | 1.365516  |
| C | 1.979863  | 2.867257 | 0.688189  |
| C | 0.672493  | 3.285103 | 1.171119  |
| C | -0.170929 | 3.547437 | 0.015095  |
| C | -1.523436 | 3.208063 | 0.046990  |
| C | -2.147930 | 2.598390 | -1.117119 |
| C | -1.394442 | 2.353546 | -2.264831 |
| C | -1.561776 | 1.104769 | -2.992333 |
| C | -0.254434 | 0.687117 | -3.475157 |
| C | 1.995174  | 1.274723 | -2.647361 |
| C | 0.720879  | 1.677868 | -3.046251 |
| C | 0.016372  | 2.707919 | -2.298256 |
| C | 0.615099  | 3.292137 | -1.182361 |
| C | 1.944330  | 2.871612 | -0.766193 |
| C | 2.620014  | 1.884313 | -1.483358 |

---

**C<sub>60</sub>** toluene (*singlet*) B3LYP-6-31G\* E= -2286.490883 u.a.

---

|   | X         | Y         | Z         |
|---|-----------|-----------|-----------|
| C | 3.129876  | -0.672289 | -1.538339 |
| C | 2.844194  | -1.904046 | -0.949563 |
| C | 1.754213  | -2.719971 | -1.462440 |
| C | 0.995332  | -2.270712 | -2.543049 |
| C | 1.293512  | -0.985927 | -3.157179 |
| C | 2.338240  | -0.203616 | -2.665420 |
| C | 1.101043  | -3.360516 | -0.331119 |
| C | -0.284025 | -3.525110 | -0.327152 |
| C | -1.075704 | -3.056646 | -1.454444 |
| C | -0.449465 | -2.442577 | -2.538937 |
| C | -1.042732 | -3.276694 | 0.889176  |
| C | -0.385023 | -2.873764 | 2.051335  |
| C | 1.059678  | -2.701799 | 2.047062  |
| C | 1.787070  | -2.940121 | 0.881067  |
| C | -0.959411 | -1.831350 | 2.888066  |
| C | -2.167734 | -1.234776 | 2.528080  |
| C | -2.853866 | -1.655089 | 1.315936  |
| C | -2.303094 | -2.654404 | 0.513727  |
| C | -2.323541 | -2.518487 | -0.934736 |
| C | 1.378291  | -1.553217 | 2.881295  |
| C | 0.130419  | -1.015129 | 3.400935  |
| C | -0.033140 | 0.363732  | 3.532640  |
| C | -1.293520 | 0.985950  | 3.157191  |
| C | -2.338159 | 0.203645  | 2.665387  |
| C | -3.129897 | 0.672303  | 1.538318  |
| C | -3.448476 | -0.476401 | 0.704189  |
| C | -3.467847 | -0.345930 | -0.684339 |
| C | -2.893552 | -1.388533 | -1.521085 |
| C | 2.411001  | -0.690266 | 2.514879  |
| C | 3.169778  | -0.938819 | 1.298621  |
| C | 2.864446  | -2.040059 | 0.498920  |
| C | -1.044104 | -1.263988 | -3.150565 |
| C | -2.240474 | -0.748135 | -2.652467 |
| C | 2.240393  | 0.748092  | 2.652489  |
| C | 1.044117  | 1.263971  | 3.150649  |

|   |           |           |           |
|---|-----------|-----------|-----------|
| C | 0.449415  | 2.442556  | 2.538999  |
| C | -0.995297 | 2.270762  | 2.543110  |
| C | -1.754156 | 2.720079  | 1.462402  |
| C | -2.844098 | 1.904033  | 0.949454  |
| C | -2.864386 | 2.040094  | -0.498915 |
| C | -3.169810 | 0.938789  | -1.298616 |
| C | -2.410973 | 0.690220  | -2.514860 |
| C | 0.033138  | -0.363775 | -3.532782 |
| C | 3.448501  | 0.476520  | -0.704196 |
| C | 3.467828  | 0.346037  | 0.684329  |
| C | 2.893558  | 1.388501  | 1.521082  |
| C | 2.323468  | 2.518429  | 0.934645  |
| C | 1.075614  | 3.056692  | 1.454408  |
| C | 0.284038  | 3.525050  | 0.327192  |
| C | -1.101004 | 3.360459  | 0.331151  |
| C | -1.786915 | 2.940021  | -0.881116 |
| C | -1.059731 | 2.701823  | -2.047054 |
| C | -1.378267 | 1.553208  | -2.881273 |
| C | -0.130416 | 1.015128  | -3.400915 |
| C | 2.167648  | 1.234727  | -2.528029 |
| C | 0.959357  | 1.831308  | -2.888039 |
| C | 0.385084  | 2.873883  | -2.051318 |
| C | 1.042650  | 3.276684  | -0.889253 |
| C | 2.303039  | 2.654393  | -0.513666 |
| C | 2.853878  | 1.655057  | -1.315868 |

---

**C<sub>60</sub>** chloroform (*singlet*) B3LYP-6-31G\* E= -2286.49117 u.a.

---

|   | X         | Y         | Z         |
|---|-----------|-----------|-----------|
| C | 0.159527  | 1.563144  | 3.185137  |
| C | -0.693362 | 2.427065  | 2.498405  |
| C | -2.030749 | 1.988397  | 2.130073  |
| C | -2.459860 | 0.703786  | 2.463414  |
| C | -1.570114 | -0.197420 | 3.179636  |
| C | -0.288056 | 0.223248  | 3.532980  |
| C | -2.340830 | 2.542176  | 0.820825  |
| C | -3.066866 | 1.788115  | -0.101014 |
| C | -3.514595 | 0.448127  | 0.246697  |
| C | -3.217379 | -0.082577 | 1.501821  |
| C | -2.678936 | 1.782775  | -1.503224 |
| C | -1.580490 | 2.531433  | -1.925702 |
| C | -0.822871 | 3.317564  | -0.964084 |
| C | -1.195031 | 3.323035  | 0.380118  |
| C | -0.642500 | 1.969066  | -2.885181 |
| C | -0.841608 | 0.681259  | -3.382602 |
| C | -1.987294 | -0.099615 | -2.941845 |
| C | -2.886739 | 0.439528  | -2.022174 |
| C | -3.403467 | -0.385343 | -0.940661 |
| C | 0.583382  | 3.241407  | -1.329418 |
| C | 0.694824  | 2.407829  | -2.516618 |
| C | 1.777751  | 1.540733  | -2.660756 |
| C | 1.570123  | 0.197406  | -3.179646 |
| C | 0.288107  | -0.223239 | -3.532896 |
| C | -0.159517 | -1.563183 | -3.185120 |
| C | -1.565724 | -1.486781 | -2.819806 |

|   |           |           |           |
|---|-----------|-----------|-----------|
| C | -2.061009 | -2.277538 | -1.783050 |
| C | -2.999131 | -1.715128 | -0.823581 |
| C | 1.559413  | 3.173266  | -0.335333 |
| C | 1.171369  | 3.178897  | 1.066885  |
| C | -0.176804 | 3.251906  | 1.416942  |
| C | -2.796038 | -1.469810 | 1.623896  |
| C | -2.689185 | -2.268829 | 0.485640  |
| C | 2.689122  | 2.268820  | -0.485717 |
| C | 2.796054  | 1.469878  | -1.623948 |
| C | 3.217350  | 0.082595  | -1.501894 |
| C | 2.459934  | -0.703764 | -2.463431 |
| C | 2.030849  | -1.988447 | -2.129992 |
| C | 0.693367  | -2.427061 | -2.498250 |
| C | 0.176877  | -3.251873 | -1.416881 |
| C | -1.171392 | -3.178893 | -1.066902 |
| C | -1.559421 | -3.173193 | 0.335331  |
| C | -1.777860 | -1.540774 | 2.660860  |
| C | 1.565836  | 1.486705  | 2.819837  |
| C | 2.061090  | 2.277453  | 1.783055  |
| C | 2.999096  | 1.715140  | 0.823577  |
| C | 3.403337  | 0.385280  | 0.940669  |
| C | 3.514565  | -0.448227 | -0.246727 |
| C | 3.066824  | -1.788042 | 0.100996  |
| C | 2.340801  | -2.542089 | -0.820808 |
| C | 1.195015  | -3.322939 | -0.379979 |
| C | 0.822875  | -3.317601 | 0.964034  |
| C | -0.583367 | -3.241357 | 1.329403  |
| C | -0.694824 | -2.407795 | 2.516587  |
| C | 0.841555  | -0.681264 | 3.382489  |
| C | 0.642450  | -1.969053 | 2.885109  |
| C | 1.580622  | -2.531454 | 1.925722  |
| C | 2.678865  | -1.782868 | 1.503227  |
| C | 2.886728  | -0.439535 | 2.022079  |
| C | 1.987309  | 0.099659  | 2.941797  |

---

**OPCBMMB** (*singlet*) B3LYP-6-31G\* E= -5003.821242 u.a.

---

|   | X         | Y         | Z         |
|---|-----------|-----------|-----------|
| C | 4.223059  | 0.669651  | -0.905037 |
| C | -2.787948 | -0.665432 | -0.981064 |
| C | 4.042869  | 1.454885  | 0.510350  |
| C | -3.287781 | 0.002302  | 0.280894  |
| C | 3.513254  | 0.633843  | 1.634413  |
| C | -2.821941 | 1.478535  | 0.287798  |
| C | 3.336908  | -0.738829 | 1.556863  |
| C | -2.473754 | 2.173409  | -0.855358 |
| C | 3.502589  | -1.450052 | 0.272961  |
| C | -2.307869 | 1.470050  | -2.145475 |
| C | 3.838612  | -0.768135 | -0.883844 |
| C | -2.464096 | 0.097785  | -2.196373 |
| C | 3.488744  | 1.252545  | -2.062265 |
| C | -2.136046 | -1.864378 | -1.014097 |
| C | 2.807394  | 2.456663  | -2.002469 |
| C | -1.793554 | -2.686022 | 0.213133  |
| C | 2.636442  | 3.168454  | -0.720985 |

|   |           |           |           |
|---|-----------|-----------|-----------|
| C | -1.800679 | -1.747650 | 1.436005  |
| C | 3.159783  | 2.655984  | 0.459209  |
| C | -2.471992 | -0.549043 | 1.468588  |
| C | 2.568620  | 1.431928  | 2.375097  |
| C | -2.159748 | 1.785217  | 1.518677  |
| C | 1.517485  | 0.836366  | 3.081090  |
| C | -1.221228 | 2.826252  | 1.601334  |
| C | 1.346073  | -0.596733 | 3.022511  |
| C | -0.873916 | 3.562955  | 0.408166  |
| C | 2.234001  | -1.363368 | 2.261781  |
| C | -1.487407 | 3.227945  | -0.804394 |
| C | 1.721954  | -2.446290 | 1.438466  |
| C | -0.702856 | 3.181420  | -2.030518 |
| C | 2.498265  | -2.497075 | 0.223195  |
| C | -1.216884 | 2.102868  | -2.861271 |
| C | 1.859814  | -2.818304 | -0.980964 |
| C | -0.335139 | 1.332261  | -3.627273 |
| C | 2.198521  | -2.089172 | -2.182682 |
| C | -0.515233 | -0.107585 | -3.697529 |
| C | 3.151344  | -1.070680 | -2.117878 |
| C | -1.566807 | -0.709177 | -2.997171 |
| C | 2.939721  | 0.166941  | -2.845770 |
| C | -1.346475 | -1.936740 | -2.256016 |
| C | 1.788757  | 0.336136  | -3.616109 |
| C | -0.100960 | -2.532942 | -2.260086 |
| C | 0.795518  | -0.725799 | -3.689942 |
| C | 0.995959  | -1.915487 | -2.980899 |
| C | 1.093150  | 1.605843  | -3.579680 |
| C | 0.440443  | -3.100784 | -1.003902 |
| C | 1.586906  | 2.634749  | -2.774023 |
| C | -0.296542 | -3.064969 | 0.160549  |
| C | 0.667540  | 3.439589  | -1.988534 |
| C | 0.346011  | -2.706489 | 1.390970  |
| C | 1.314497  | 3.766936  | -0.726189 |
| C | -0.577631 | -1.902975 | 2.176134  |
| C | 0.555147  | 3.836055  | 0.444996  |
| C | -0.082926 | -0.874256 | 2.985355  |
| C | 1.084471  | 3.270178  | 1.667550  |
| C | -0.786684 | 0.384668  | 3.022555  |
| C | -0.010577 | 2.644260  | 2.387847  |
| C | 0.200118  | 1.451744  | 3.079184  |
| C | 2.348421  | 2.670935  | 1.654022  |
| C | -1.936764 | 0.540673  | 2.240142  |
| C | 5.381766  | 1.281863  | -0.158558 |
| C | 6.347594  | 0.312867  | 0.471151  |
| C | 6.964711  | -0.662385 | -0.319619 |
| C | 7.878432  | -1.554476 | 0.239003  |
| C | 8.186866  | -1.477877 | 1.598331  |
| C | 7.582061  | -0.502350 | 2.391652  |
| C | 6.665670  | 0.387296  | 1.830654  |
| H | 6.183331  | 1.134473  | 2.453107  |
| H | 7.816587  | -0.436535 | 3.450100  |
| H | 8.893165  | -2.176874 | 2.036973  |
| H | 8.339228  | -2.314741 | -0.384555 |
| H | 6.711111  | -0.734211 | -1.373558 |
| C | 6.032195  | 2.529767  | -0.751975 |
| C | 6.589524  | 3.464753  | 0.322685  |
| C | 7.190526  | 4.731987  | -0.279585 |
| C | 7.734068  | 5.671350  | 0.776459  |
| O | 7.705552  | 5.480063  | 1.972838  |

|   |           |           |           |
|---|-----------|-----------|-----------|
| O | 8.266427  | 6.777370  | 0.209995  |
| C | 8.806835  | 7.736033  | 1.132928  |
| H | 8.029443  | 8.094985  | 1.812567  |
| H | 9.612539  | 7.289918  | 1.721957  |
| H | 9.186811  | 8.552395  | 0.518385  |
| H | 8.005316  | 4.496169  | -0.976613 |
| H | 6.446661  | 5.282066  | -0.871015 |
| H | 7.348697  | 2.949274  | 0.919171  |
| H | 5.788956  | 3.741966  | 1.017969  |
| H | 5.305535  | 3.070234  | -1.366226 |
| H | 6.832813  | 2.203546  | -1.428068 |
| C | -4.838964 | -0.152291 | 0.433345  |
| H | -5.135401 | 0.296249  | 1.385833  |
| H | -5.070117 | -1.218533 | 0.471939  |
| C | -5.539715 | 0.534962  | -0.709555 |
| C | -5.823088 | -0.131926 | -1.910927 |
| C | -6.311655 | 0.592460  | -3.005075 |
| C | -6.468169 | 1.974654  | -2.929081 |
| C | -6.164676 | 2.649590  | -1.744414 |
| C | -5.748677 | 1.912875  | -0.633633 |
| O | -5.580982 | -1.483608 | -1.943793 |
| H | -6.538935 | 0.085946  | -3.935955 |
| H | -6.798184 | 2.545641  | -3.790777 |
| O | -6.247102 | 4.015541  | -1.747317 |
| H | -5.512153 | 2.415463  | 0.295621  |
| C | -5.229437 | -2.056988 | -3.204386 |
| C | -5.439179 | 4.691363  | -0.778329 |
| C | -5.130959 | 6.099459  | -1.257536 |
| C | -4.734938 | -3.475805 | -2.969905 |
| C | -4.050080 | 6.737747  | -0.378815 |
| H | -4.778908 | 6.042509  | -2.295248 |
| H | -6.043180 | 6.709445  | -1.262037 |
| H | -5.953158 | 4.711697  | 0.193237  |
| H | -4.499571 | 4.140536  | -0.647327 |
| H | -4.450202 | -1.441772 | -3.675523 |
| H | -6.100825 | -2.069919 | -3.874468 |
| C | -4.217139 | -4.111705 | -4.266740 |
| H | -3.945672 | -3.444099 | -2.213889 |
| H | -5.554482 | -4.075121 | -2.551980 |
| H | -3.300824 | -3.594000 | -4.580165 |
| H | -4.950880 | -3.940384 | -5.067146 |
| C | -3.966284 | -5.624556 | -4.165945 |
| C | -3.706682 | 8.177282  | -0.777462 |
| C | -2.477259 | 8.746339  | -0.038557 |
| H | -3.534345 | 8.224734  | -1.862451 |
| H | -4.584366 | 8.808348  | -0.586386 |
| C | -1.154750 | 8.629366  | -0.812183 |
| H | -1.234760 | 9.222386  | -1.735510 |
| H | -0.357786 | 9.100835  | -0.219517 |
| C | -0.712849 | 7.208594  | -1.182787 |
| H | -4.372004 | 6.728517  | 0.673270  |
| H | -3.148088 | 6.114231  | -0.421212 |
| H | -2.377542 | 8.248195  | 0.936646  |
| H | -2.642534 | 9.808347  | 0.182341  |
| C | -2.855330 | -6.054135 | -3.196054 |
| H | -3.056710 | -5.642439 | -2.198476 |
| H | -2.897482 | -7.145662 | -3.078655 |
| C | -1.440217 | -5.666458 | -3.639384 |
| H | -3.727094 | -6.010212 | -5.166664 |
| H | -4.905424 | -6.110514 | -3.867510 |

|   |           |           |           |
|---|-----------|-----------|-----------|
| H | -1.468372 | 6.736186  | -1.823799 |
| C | 0.635929  | 7.197645  | -1.906785 |
| H | 0.598293  | 7.813208  | -2.814140 |
| H | 0.925296  | 6.184429  | -2.200474 |
| H | 1.429932  | 7.600937  | -1.266339 |
| C | -0.354949 | -6.124978 | -2.658091 |
| C | 1.066870  | -5.870165 | -3.164329 |
| H | -1.243990 | -6.105781 | -4.628657 |
| H | -1.365044 | -4.579167 | -3.766233 |
| H | -0.494939 | -5.604203 | -1.701791 |
| H | -0.483336 | -7.196214 | -2.447447 |
| H | 1.816909  | -6.168525 | -2.423350 |
| H | 1.224511  | -4.809371 | -3.387464 |
| H | 1.262732  | -6.433377 | -4.084725 |
| H | -0.649917 | 6.590110  | -0.276940 |
| C | -2.712586 | -3.940885 | 0.381831  |
| H | -2.625830 | -4.533659 | -0.532746 |
| H | -3.745308 | -3.595753 | 0.463472  |
| C | -2.309121 | -4.769387 | 1.572222  |
| C | -2.828563 | -4.493048 | 2.847828  |
| C | -2.353072 | -5.194378 | 3.959650  |
| C | -1.356775 | -6.157560 | 3.807868  |
| C | -0.837751 | -6.446634 | 2.544514  |
| C | -1.328905 | -5.753230 | 1.434777  |
| O | -3.793493 | -3.523172 | 2.907178  |
| H | -2.747275 | -4.988114 | 4.948130  |
| H | -0.970487 | -6.697185 | 4.666260  |
| O | 0.104711  | -7.440994 | 2.469540  |
| H | -0.944162 | -5.960777 | 0.443109  |
| C | -4.057906 | -2.890533 | 4.158871  |
| C | 1.150528  | -7.313197 | 1.499986  |
| C | 2.169402  | -6.244428 | 1.884726  |
| C | -4.914467 | -1.672009 | 3.858393  |
| C | 3.318785  | -6.147392 | 0.874438  |
| H | 1.666020  | -5.274433 | 1.973688  |
| H | 2.560606  | -6.489317 | 2.880793  |
| H | 1.622023  | -8.300223 | 1.477504  |
| H | 0.741541  | -7.126923 | 0.498337  |
| H | -3.108402 | -2.594597 | 4.627292  |
| H | -4.570888 | -3.586546 | 4.838461  |
| C | -5.261249 | -0.825137 | 5.088470  |
| H | -4.363085 | -1.069411 | 3.132505  |
| H | -5.835150 | -1.998089 | 3.358297  |
| H | -4.359143 | -0.661732 | 5.695996  |
| H | -5.967386 | -1.373580 | 5.725237  |
| C | -5.853743 | 0.540066  | 4.693718  |
| C | 4.459528  | -5.241813 | 1.360110  |
| C | 5.732711  | -5.237366 | 0.494915  |
| H | 4.091639  | -4.215003 | 1.474677  |
| H | 4.738352  | -5.575434 | 2.369524  |
| C | 5.711838  | -4.394761 | -0.790341 |
| H | 5.472202  | -3.354611 | -0.535627 |
| H | 6.737306  | -4.375460 | -1.189059 |
| C | 4.776961  | -4.869329 | -1.909530 |
| H | 3.723695  | -7.152627 | 0.683437  |
| H | 2.923400  | -5.789650 | -0.082421 |
| H | 6.000264  | -6.274977 | 0.244203  |
| H | 6.553810  | -4.855379 | 1.116357  |
| C | -4.785794 | 1.517745  | 4.177620  |
| H | -4.210885 | 1.908436  | 5.029357  |



|   |           |           |           |
|---|-----------|-----------|-----------|
| H | -4.063755 | 0.968743  | 3.565072  |
| C | -5.326103 | 2.684418  | 3.343782  |
| H | -6.377969 | 0.979569  | 5.550701  |
| H | -6.616454 | 0.384311  | 3.916220  |
| H | 3.734655  | -4.706113 | -1.619515 |
| C | 5.038502  | -4.146444 | -3.233193 |
| H | 4.939357  | -3.061739 | -3.112951 |
| H | 4.328283  | -4.458710 | -4.007297 |
| H | 6.051375  | -4.350770 | -3.601914 |
| C | -6.200251 | 3.678727  | 4.113791  |
| C | -6.673025 | 4.840466  | 3.236065  |
| H | -4.478127 | 3.224382  | 2.898753  |
| H | -5.907460 | 2.281531  | 2.501092  |
| H | -7.071729 | 3.159350  | 4.533531  |
| H | -5.632698 | 4.068627  | 4.970474  |
| H | -5.819592 | 5.393358  | 2.823165  |
| H | -7.289750 | 5.549884  | 3.798887  |
| H | -7.270733 | 4.476460  | 2.391084  |
| H | 4.893485  | -5.953018 | -2.052684 |

---

**OPCBMMB** xylene (*singlet*) B3LYP-6-31G\* E= -5003.828565 u.a.

---

|   | X         | Y         | Z         |
|---|-----------|-----------|-----------|
| C | 4.214666  | 0.735263  | -0.903936 |
| C | -2.772689 | -0.722781 | -0.988418 |
| C | 4.017592  | 1.524640  | 0.507125  |
| C | -3.286838 | -0.057169 | 0.268989  |
| C | 3.499285  | 0.700170  | 1.633836  |
| C | -2.846563 | 1.426988  | 0.269192  |
| C | 3.347139  | -0.675768 | 1.563248  |
| C | -2.508005 | 2.121984  | -0.876745 |
| C | 3.528263  | -1.390663 | 0.283468  |
| C | -2.326790 | 1.414873  | -2.162822 |
| C | 3.855087  | -0.708777 | -0.875973 |
| C | -2.458735 | 0.039770  | -2.206776 |
| C | 3.472475  | 1.299038  | -2.065415 |
| C | -2.099756 | -1.910333 | -1.013840 |
| C | 2.770182  | 2.491399  | -2.013648 |
| C | -1.745681 | -2.719602 | 0.218366  |
| C | 2.583859  | 3.206624  | -0.736328 |
| C | -1.771818 | -1.774951 | 1.436209  |
| C | 3.113385  | 2.709409  | 0.447571  |
| C | -2.464048 | -0.588159 | 1.461245  |
| C | 2.539075  | 1.485262  | 2.368357  |
| C | -2.192687 | 1.751457  | 1.499906  |
| C | 1.496923  | 0.875120  | 3.075306  |
| C | -1.272756 | 2.809143  | 1.579208  |
| C | 1.350675  | -0.561061 | 3.023849  |
| C | -0.935533 | 3.545633  | 0.382954  |
| C | 2.253569  | -1.315843 | 2.268857  |
| C | -1.540311 | 3.193739  | -0.829158 |
| C | 1.762547  | -2.411909 | 1.450138  |
| C | -0.752194 | 3.154560  | -2.053217 |
| C | 2.542467  | -2.455316 | 0.236942  |
| C | -1.245346 | 2.062945  | -2.879553 |

|   |           |           |           |
|---|-----------|-----------|-----------|
| C | 1.912470  | -2.794106 | -0.966818 |
| C | -0.348500 | 1.303836  | -3.639547 |
| C | 2.241199  | -2.065261 | -2.171506 |
| C | -0.503266 | -0.139289 | -3.702661 |
| C | 3.175887  | -1.029868 | -2.109802 |
| C | -1.545688 | -0.755577 | -3.001331 |
| C | 2.944301  | 0.200051  | -2.844545 |
| C | -1.305838 | -1.975200 | -2.253420 |
| C | 1.792475  | 0.345057  | -3.618598 |
| C | -0.050103 | -2.549428 | -2.251571 |
| C | 0.818083  | -0.734454 | -3.689045 |
| C | 1.037572  | -1.916715 | -2.973216 |
| C | 1.074716  | 1.602578  | -3.590342 |
| C | 0.498295  | -3.101368 | -0.991432 |
| C | 1.548518  | 2.643969  | -2.788695 |
| C | -0.242039 | -3.072779 | 0.171060  |
| C | 0.613402  | 3.436767  | -2.009562 |
| C | 0.391424  | -2.696460 | 1.400912  |
| C | 1.251690  | 3.781833  | -0.747524 |
| C | -0.547875 | -1.905003 | 2.179765  |
| C | 0.488404  | 3.843835  | 0.421586  |
| C | -0.073160 | -0.863679 | 2.984835  |
| C | 1.024739  | 3.293685  | 1.648214  |
| C | -0.798977 | 0.382921  | 3.014037  |
| C | -0.060929 | 2.652459  | 2.369341  |
| C | 0.168951  | 1.467306  | 3.067279  |
| C | 2.298980  | 2.716410  | 1.640385  |
| C | -1.949692 | 0.514741  | 2.228172  |
| C | 5.360745  | 1.371825  | -0.158279 |
| C | 6.341863  | 0.422508  | 0.478052  |
| C | 6.980988  | -0.542060 | -0.308727 |
| C | 7.909088  | -1.415967 | 0.255559  |
| C | 8.209788  | -1.331739 | 1.616574  |
| C | 7.582922  | -0.366385 | 2.405779  |
| C | 6.652343  | 0.505268  | 1.838993  |
| H | 6.153841  | 1.244270  | 2.458450  |
| H | 7.811327  | -0.294561 | 3.465131  |
| H | 8.927206  | -2.016483 | 2.059508  |
| H | 8.387917  | -2.167578 | -0.364889 |
| H | 6.734765  | -0.619292 | -1.363989 |
| C | 5.990440  | 2.627705  | -0.757359 |
| C | 6.526580  | 3.579489  | 0.313483  |
| C | 7.108392  | 4.851550  | -0.297277 |
| C | 7.631818  | 5.812093  | 0.748909  |
| O | 7.604909  | 5.633033  | 1.949132  |
| O | 8.143275  | 6.920671  | 0.173276  |
| C | 8.666776  | 7.904168  | 1.082725  |
| H | 7.883491  | 8.255443  | 1.759102  |
| H | 9.485288  | 7.483072  | 1.671951  |
| H | 9.026325  | 8.720087  | 0.456055  |
| H | 7.929867  | 4.622254  | -0.988315 |
| H | 6.357145  | 5.382437  | -0.896565 |
| H | 7.291863  | 3.080132  | 0.915981  |
| H | 5.717246  | 3.847681  | 1.002176  |
| H | 5.256705  | 3.151665  | -1.377276 |
| H | 6.799290  | 2.312433  | -1.428402 |
| C | -4.835497 | -0.237706 | 0.420252  |
| H | -5.141013 | 0.206573  | 1.371672  |
| H | -5.048868 | -1.307508 | 0.459959  |
| C | -5.546419 | 0.437047  | -0.723970 |

|   |           |           |           |
|---|-----------|-----------|-----------|
| C | -5.815943 | -0.233217 | -1.927184 |
| C | -6.312874 | 0.484435  | -3.022246 |
| C | -6.493593 | 1.864093  | -2.944440 |
| C | -6.207077 | 2.541836  | -1.756928 |
| C | -5.780542 | 1.810882  | -0.646219 |
| O | -5.554803 | -1.580966 | -1.960872 |
| H | -6.528031 | -0.024107 | -3.954870 |
| H | -6.830499 | 2.429126  | -3.807595 |
| O | -6.316230 | 3.906867  | -1.755374 |
| H | -5.555863 | 2.315760  | 0.284643  |
| C | -5.183549 | -2.147703 | -3.221341 |
| C | -5.522622 | 4.594063  | -0.779082 |
| C | -5.247517 | 6.013014  | -1.245409 |
| C | -4.668856 | -3.558567 | -2.983585 |
| C | -4.184586 | 6.668750  | -0.357545 |
| H | -4.890167 | 5.974782  | -2.282233 |
| H | -6.173719 | 6.601617  | -1.245916 |
| H | -6.037153 | 4.592581  | 0.191842  |
| H | -4.571139 | 4.062952  | -0.654586 |
| H | -4.410283 | -1.519080 | -3.683724 |
| H | -6.049082 | -2.172557 | -3.897740 |
| C | -4.129253 | -4.184398 | -4.276488 |
| H | -3.886956 | -3.515915 | -2.220298 |
| H | -5.482691 | -4.171988 | -2.575069 |
| H | -3.218042 | -3.652264 | -4.580446 |
| H | -4.858287 | -4.023286 | -5.083060 |
| C | -3.856601 | -5.693350 | -4.173947 |
| C | -3.869977 | 8.117231  | -0.747597 |
| C | -2.657850 | 8.709409  | 0.001578  |
| H | -3.691738 | 8.173372  | -1.831217 |
| H | -4.762227 | 8.728121  | -0.558607 |
| C | -1.327206 | 8.620067  | -0.761840 |
| H | -1.411896 | 9.212496  | -1.685126 |
| H | -0.544395 | 9.106088  | -0.162028 |
| C | -0.854738 | 7.208741  | -1.130591 |
| H | -4.511666 | 6.647015  | 0.692536  |
| H | -3.269761 | 6.064320  | -0.399529 |
| H | -2.555817 | 8.211822  | 0.976847  |
| H | -2.846119 | 9.767636  | 0.222279  |
| C | -2.747709 | -6.106220 | -3.194467 |
| H | -2.960623 | -5.692409 | -2.200132 |
| H | -2.777732 | -7.197685 | -3.072847 |
| C | -1.334077 | -5.704093 | -3.629486 |
| H | -3.602976 | -6.075095 | -5.172604 |
| H | -4.790964 | -6.193033 | -3.883421 |
| H | -1.595251 | 6.723258  | -1.779194 |
| C | 0.500617  | 7.224113  | -1.842217 |
| H | 0.458631  | 7.837728  | -2.750767 |
| H | 0.812896  | 6.216339  | -2.131638 |
| H | 1.280387  | 7.644150  | -1.194967 |
| C | -0.251645 | -6.142787 | -2.636197 |
| C | 1.171409  | -5.873751 | -3.131498 |
| H | -1.124693 | -6.147895 | -4.614039 |
| H | -1.271538 | -4.616756 | -3.762922 |
| H | -0.406380 | -5.617713 | -1.684611 |
| H | -0.368479 | -7.214100 | -2.419668 |
| H | 1.918003  | -6.158219 | -2.381537 |
| H | 1.318102  | -4.812395 | -3.359879 |
| H | 1.382211  | -6.440363 | -4.046550 |
| H | -0.788341 | 6.590106  | -0.225093 |

|   |           |           |           |
|---|-----------|-----------|-----------|
| C | -2.643769 | -3.989203 | 0.391406  |
| H | -2.548017 | -4.583793 | -0.520954 |
| H | -3.682020 | -3.661182 | 0.472591  |
| C | -2.225137 | -4.805983 | 1.584923  |
| C | -2.744425 | -4.530902 | 2.861574  |
| C | -2.251447 | -5.216521 | 3.975934  |
| C | -1.239048 | -6.163714 | 3.825516  |
| C | -0.722311 | -6.452852 | 2.561191  |
| C | -1.230061 | -5.775136 | 1.449139  |
| O | -3.727017 | -3.580026 | 2.919643  |
| H | -2.643805 | -5.010126 | 4.965038  |
| H | -0.840056 | -6.689283 | 4.687002  |
| O | 0.235696  | -7.434047 | 2.485256  |
| H | -0.845917 | -5.982705 | 0.457265  |
| C | -3.992893 | -2.938156 | 4.169079  |
| C | 1.282652  | -7.285233 | 1.516467  |
| C | 2.282518  | -6.200835 | 1.905987  |
| C | -4.877914 | -1.741560 | 3.863830  |
| C | 3.428161  | -6.081198 | 0.893706  |
| H | 1.762966  | -5.239624 | 1.998512  |
| H | 2.680184  | -6.442825 | 2.900245  |
| H | 1.770470  | -8.264052 | 1.491351  |
| H | 0.870843  | -7.102253 | 0.515874  |
| H | -3.044788 | -2.618025 | 4.623259  |
| H | -4.484189 | -3.637557 | 4.860194  |
| C | -5.228133 | -0.889339 | 5.089283  |
| H | -4.347521 | -1.135158 | 3.125487  |
| H | -5.797705 | -2.091869 | 3.378697  |
| H | -4.321770 | -0.697633 | 5.681848  |
| H | -5.911739 | -1.448069 | 5.741294  |
| C | -5.859761 | 0.456415  | 4.688579  |
| C | 4.554595  | -5.158111 | 1.379452  |
| C | 5.826387  | -5.132395 | 0.512619  |
| H | 4.170575  | -4.137334 | 1.495518  |
| H | 4.840375  | -5.488624 | 2.387961  |
| C | 5.788339  | -4.296233 | -0.776563 |
| H | 5.524790  | -3.260597 | -0.527266 |
| H | 6.813714  | -4.255436 | -1.173601 |
| C | 4.866341  | -4.797141 | -1.895077 |
| H | 3.849026  | -7.078946 | 0.698850  |
| H | 3.024029  | -5.726895 | -0.060667 |
| H | 6.113603  | -6.165777 | 0.266109  |
| H | 6.640391  | -4.731788 | 1.131720  |
| C | -4.824316 | 1.454026  | 4.145431  |
| H | -4.241875 | 1.863259  | 4.983231  |
| H | -4.102402 | 0.916706  | 3.522461  |
| C | -5.406555 | 2.602756  | 3.314731  |
| H | -6.380827 | 0.892683  | 5.549109  |
| H | -6.630232 | 0.273773  | 3.924750  |
| H | 3.820025  | -4.654270 | -1.608879 |
| C | 5.116096  | -4.076703 | -3.222462 |
| H | 4.992780  | -2.993742 | -3.108716 |
| H | 4.415162  | -4.409268 | -3.996755 |
| H | 6.134483  | -4.260982 | -3.586648 |
| C | -6.288695 | 3.581504  | 4.095481  |
| C | -6.803753 | 4.727368  | 3.220617  |
| H | -4.579573 | 3.159434  | 2.850841  |
| H | -5.994467 | 2.181713  | 2.485600  |
| H | -7.140136 | 3.044497  | 4.533613  |
| H | -5.714402 | 3.988874  | 4.939439  |

|   |           |           |           |
|---|-----------|-----------|-----------|
| H | -5.970626 | 5.298193  | 2.790966  |
| H | -7.427603 | 5.424588  | 3.790954  |
| H | -7.406653 | 4.344927  | 2.387448  |
| H | 5.006212  | -5.878959 | -2.031431 |

---

**OPCBMMB** toluene (*singlet*) B3LYP-6-31G\* E= -5003.828118 u.a.

---

|   | X         | Y         | Z         |
|---|-----------|-----------|-----------|
| C | 4.205237  | 0.772419  | -0.913300 |
| C | -2.768484 | -0.751480 | -0.971442 |
| C | 4.006004  | 1.560264  | 0.498428  |
| C | -3.283921 | -0.090426 | 0.288142  |
| C | 3.499733  | 0.731196  | 1.627205  |
| C | -2.857597 | 1.397769  | 0.286474  |
| C | 3.360252  | -0.646120 | 1.557426  |
| C | -2.529971 | 2.095630  | -0.860946 |
| C | 3.543273  | -1.359528 | 0.277118  |
| C | -2.347040 | 1.390035  | -2.147642 |
| C | 3.859341  | -0.674903 | -0.883696 |
| C | -2.466184 | 0.013744  | -2.190960 |
| C | 3.453345  | 1.328928  | -2.072033 |
| C | -2.084547 | -1.932902 | -0.999312 |
| C | 2.740043  | 2.514618  | -2.017816 |
| C | -1.718159 | -2.738047 | 0.232006  |
| C | 2.551816  | 3.228359  | -0.739953 |
| C | -1.748558 | -1.793208 | 1.449565  |
| C | 3.090436  | 2.736390  | 0.442039  |
| C | -2.451759 | -0.613313 | 1.477187  |
| C | 2.534929  | 1.507356  | 2.365204  |
| C | -2.202348 | 1.728745  | 1.514625  |
| C | 1.501224  | 0.887589  | 3.076183  |
| C | -1.292132 | 2.795054  | 1.590217  |
| C | 1.368312  | -0.549894 | 3.025518  |
| C | -0.966369 | 3.534352  | 0.392541  |
| C | 2.275425  | -1.296304 | 2.267291  |
| C | -1.572313 | 3.176478  | -0.817225 |
| C | 1.791702  | -2.397140 | 1.450641  |
| C | -0.788534 | 3.144541  | -2.044288 |
| C | 2.567417  | -2.433453 | 0.234489  |
| C | -1.274485 | 2.048161  | -2.868577 |
| C | 1.936123  | -2.778450 | -0.966800 |
| C | -0.373394 | 1.297339  | -3.631821 |
| C | 2.253440  | -2.046881 | -2.172889 |
| C | -0.514788 | -0.147225 | -3.694123 |
| C | 3.178567  | -1.002701 | -2.114894 |
| C | -1.548718 | -0.773218 | -2.988856 |
| C | 2.932607  | 0.224834  | -2.848987 |
| C | -1.294631 | -1.990453 | -2.241707 |
| C | 1.776583  | 0.358782  | -3.618755 |
| C | -0.033515 | -2.552698 | -2.244333 |
| C | 0.812157  | -0.729893 | -3.685365 |
| C | 1.045457  | -1.909911 | -2.970127 |
| C | 1.047107  | 1.609502  | -3.587998 |
| C | 0.524795  | -3.099007 | -0.986030 |
| C | 1.514087  | 2.655498  | -2.788308 |

|   |           |           |           |
|---|-----------|-----------|-----------|
| C | -0.211382 | -3.077059 | 0.179284  |
| C | 0.574493  | 3.439650  | -2.005804 |
| C | 0.423141  | -2.694503 | 1.406577  |
| C | 1.214250  | 3.791004  | -0.746234 |
| C | -0.520635 | -1.911689 | 2.188675  |
| C | 0.454833  | 3.846018  | 0.425744  |
| C | -0.052755 | -0.865878 | 2.991887  |
| C | 1.000931  | 3.301251  | 1.650470  |
| C | -0.790179 | 0.373763  | 3.023690  |
| C | -0.075928 | 2.650002  | 2.375804  |
| C | 0.167724  | 1.467232  | 3.073073  |
| C | 2.280512  | 2.736015  | 1.637934  |
| C | -1.945028 | 0.494535  | 2.242172  |
| C | 5.348018  | 1.419915  | -0.172050 |
| C | 6.340438  | 0.480000  | 0.460549  |
| C | 6.985478  | -0.478724 | -0.328532 |
| C | 7.924200  | -1.343529 | 0.232282  |
| C | 8.229691  | -1.255899 | 1.592055  |
| C | 7.596844  | -0.296233 | 2.383521  |
| C | 6.655623  | 0.566262  | 1.820236  |
| H | 6.152690  | 1.300754  | 2.441472  |
| H | 7.828896  | -0.221807 | 3.441892  |
| H | 8.955434  | -1.933581 | 2.032267  |
| H | 8.407684  | -2.090709 | -0.389896 |
| H | 6.735755  | -0.558647 | -1.382773 |
| C | 5.963593  | 2.681551  | -0.773649 |
| C | 6.495498  | 3.638198  | 0.294883  |
| C | 7.063240  | 4.915241  | -0.318643 |
| C | 7.583535  | 5.880382  | 0.724766  |
| O | 7.568658  | 5.699720  | 1.925003  |
| O | 8.079478  | 6.994523  | 0.146093  |
| C | 8.600364  | 7.982522  | 1.052104  |
| H | 7.819691  | 8.323652  | 1.736659  |
| H | 9.429606  | 7.570036  | 1.632420  |
| H | 8.944281  | 8.803477  | 0.423332  |
| H | 7.883477  | 4.692954  | -1.013450 |
| H | 6.304644  | 5.439603  | -0.914293 |
| H | 7.267777  | 3.145889  | 0.894287  |
| H | 5.686516  | 3.899221  | 0.986814  |
| H | 5.222699  | 3.198709  | -1.390737 |
| H | 6.772540  | 2.373546  | -1.447894 |
| C | -4.830170 | -0.285796 | 0.445715  |
| H | -5.136175 | 0.155142  | 1.398470  |
| H | -5.032915 | -1.357619 | 0.485840  |
| C | -5.552498 | 0.383117  | -0.694515 |
| C | -5.822978 | -0.287230 | -1.897431 |
| C | -6.331763 | 0.428458  | -2.988531 |
| C | -6.523232 | 1.806574  | -2.907159 |
| C | -6.235643 | 2.484088  | -1.719715 |
| C | -5.797194 | 1.754677  | -0.612991 |
| O | -5.550675 | -1.632699 | -1.935377 |
| H | -6.547683 | -0.080081 | -3.920973 |
| H | -6.869235 | 2.370607  | -3.767398 |
| O | -6.354668 | 3.848017  | -1.712880 |
| H | -5.571227 | 2.259875  | 0.317637  |
| C | -5.179093 | -2.192949 | -3.198622 |
| C | -5.560833 | 4.534659  | -0.736491 |
| C | -5.299898 | 5.959394  | -1.193299 |
| C | -4.649814 | -3.599352 | -2.966400 |
| C | -4.236851 | 6.616190  | -0.306441 |

|   |           |           |           |
|---|-----------|-----------|-----------|
| H | -4.948444 | 5.932281  | -2.232516 |
| H | -6.230670 | 6.540694  | -1.183485 |
| H | -6.069286 | 4.521095  | 0.237347  |
| H | -4.604384 | 4.010282  | -0.621768 |
| H | -4.413873 | -1.555873 | -3.662796 |
| H | -6.047046 | -2.224721 | -3.871580 |
| C | -4.110685 | -4.216941 | -4.263402 |
| H | -3.864782 | -3.551057 | -2.206576 |
| H | -5.455910 | -4.221436 | -2.555611 |
| H | -3.206106 | -3.675458 | -4.570657 |
| H | -4.845284 | -4.060738 | -5.065860 |
| C | -3.823489 | -5.723534 | -4.166017 |
| C | -3.934133 | 8.069693  | -0.687267 |
| C | -2.721172 | 8.663656  | 0.059302  |
| H | -3.762844 | 8.135424  | -1.771458 |
| H | -4.829066 | 8.673362  | -0.488125 |
| C | -1.394659 | 8.588445  | -0.712855 |
| H | -1.488516 | 9.187624  | -1.630886 |
| H | -0.611096 | 9.074359  | -0.113929 |
| C | -0.916073 | 7.182947  | -1.095648 |
| H | -4.558042 | 6.584407  | 0.745197  |
| H | -3.318060 | 6.018508  | -0.357725 |
| H | -2.610240 | 8.159143  | 1.030025  |
| H | -2.914529 | 9.718951  | 0.289395  |
| C | -2.704676 | -6.128158 | -3.194395 |
| H | -2.914608 | -5.717600 | -2.198061 |
| H | -2.724269 | -7.220016 | -3.074203 |
| C | -1.297581 | -5.713091 | -3.638268 |
| H | -3.572531 | -6.100739 | -5.167064 |
| H | -4.751387 | -6.232457 | -3.870859 |
| H | -1.657407 | 6.698341  | -1.743945 |
| C | 0.435159  | 7.211830  | -1.814669 |
| H | 0.384721  | 7.833112  | -2.717577 |
| H | 0.751193  | 6.208286  | -2.114629 |
| H | 1.216330  | 7.630390  | -1.168151 |
| C | -0.204790 | -6.143424 | -2.652748 |
| C | 1.212542  | -5.860305 | -3.156574 |
| H | -1.090813 | -6.153813 | -4.624759 |
| H | -1.245570 | -4.625069 | -3.770674 |
| H | -0.358290 | -5.621281 | -1.699410 |
| H | -0.310332 | -7.216078 | -2.437143 |
| H | 1.966439  | -6.139318 | -2.411863 |
| H | 1.347962  | -4.797150 | -3.383692 |
| H | 1.422754  | -6.423125 | -4.074110 |
| H | -0.840941 | 6.557538  | -0.195529 |
| C | -2.603440 | -4.015868 | 0.410594  |
| H | -2.507029 | -4.611249 | -0.501181 |
| H | -3.644376 | -3.697857 | 0.496998  |
| C | -2.168936 | -4.823616 | 1.604318  |
| C | -2.682797 | -4.543042 | 2.881543  |
| C | -2.175505 | -5.212669 | 3.999018  |
| C | -1.154070 | -6.150764 | 3.849841  |
| C | -0.643209 | -6.446263 | 2.584244  |
| C | -1.165328 | -5.783718 | 1.469529  |
| O | -3.675123 | -3.601785 | 2.932776  |
| H | -2.563187 | -5.001002 | 4.988837  |
| H | -0.743467 | -6.664156 | 4.713245  |
| O | 0.324066  | -7.418607 | 2.509284  |
| H | -0.785733 | -5.996016 | 0.476918  |
| C | -3.945796 | -2.940898 | 4.171133  |

|   |           |           |           |
|---|-----------|-----------|-----------|
| C | 1.368251  | -7.261788 | 1.538648  |
| C | 2.359684  | -6.168263 | 1.924258  |
| C | -4.851566 | -1.766059 | 3.842197  |
| C | 3.499568  | -6.039450 | 0.906603  |
| H | 1.831664  | -5.211729 | 2.018073  |
| H | 2.763749  | -6.405741 | 2.917032  |
| H | 1.864363  | -8.236427 | 1.513660  |
| H | 0.953437  | -7.083191 | 0.538561  |
| H | -3.001671 | -2.596306 | 4.615621  |
| H | -4.423622 | -3.633613 | 4.878213  |
| C | -5.217477 | -0.891659 | 5.047124  |
| H | -4.332474 | -1.166778 | 3.090096  |
| H | -5.765360 | -2.143623 | 3.366241  |
| H | -4.314884 | -0.666380 | 5.633598  |
| H | -5.888815 | -1.447575 | 5.714089  |
| C | -5.877283 | 0.429661  | 4.611240  |
| C | 4.619825  | -5.105205 | 1.384908  |
| C | 5.887924  | -5.071395 | 0.513026  |
| H | 4.227410  | -4.087378 | 1.499182  |
| H | 4.912824  | -5.429826 | 2.393280  |
| C | 5.836706  | -4.244586 | -0.781759 |
| H | 5.561399  | -3.210526 | -0.538923 |
| H | 6.860632  | -4.194241 | -1.181388 |
| C | 4.918419  | -4.764210 | -1.894846 |
| H | 3.928572  | -7.033617 | 0.711194  |
| H | 3.087436  | -5.690301 | -0.046242 |
| H | 6.185245  | -6.103306 | 0.272328  |
| H | 6.699689  | -4.657945 | 1.126622  |
| C | -4.863560 | 1.433759  | 4.039357  |
| H | -4.290495 | 1.878896  | 4.865217  |
| H | -4.130032 | 0.894768  | 3.431384  |
| C | -5.470490 | 2.545534  | 3.176157  |
| H | -6.407064 | 0.878397  | 5.459951  |
| H | -6.644074 | 0.209907  | 3.853538  |
| H | 3.871024  | -4.631825 | -1.607610 |
| C | 5.156912  | -4.050145 | -3.227759 |
| H | 5.020358  | -2.968015 | -3.121393 |
| H | 4.458767  | -4.396882 | -3.998381 |
| H | 6.176863  | -4.224334 | -3.592548 |
| C | -6.379124 | 3.524546  | 3.925499  |
| C | -6.920063 | 4.630561  | 3.015172  |
| H | -4.655309 | 3.108633  | 2.699217  |
| H | -6.045577 | 2.087916  | 2.357740  |
| H | -7.218184 | 2.979363  | 4.377194  |
| H | -5.818239 | 3.971197  | 4.758521  |
| H | -6.100056 | 5.209605  | 2.571523  |
| H | -7.563465 | 5.328226  | 3.562820  |
| H | -7.510121 | 4.208746  | 2.191379  |
| H | 5.070851  | -5.845225 | -2.023956 |

---

**OPCBMMB** chloroform (*singlet*) B3LYP-6-31G\* E= -5003.832582 u.a.

---

|   | X         | Y         | Z         |
|---|-----------|-----------|-----------|
| C | 4.212088  | 0.753260  | -0.902377 |
| C | -2.768279 | -0.740296 | -0.991069 |



|   |           |           |           |
|---|-----------|-----------|-----------|
| C | 4.009461  | 1.544884  | 0.506631  |
| C | -3.286981 | -0.074194 | 0.264260  |
| C | 3.493759  | 0.720468  | 1.634475  |
| C | -2.853943 | 1.412104  | 0.261394  |
| C | 3.348715  | -0.656406 | 1.567119  |
| C | -2.517745 | 2.106184  | -0.885752 |
| C | 3.534981  | -1.373420 | 0.289214  |
| C | -2.331394 | 1.396919  | -2.169947 |
| C | 3.859564  | -0.692422 | -0.871374 |
| C | -2.456369 | 0.021023  | -2.210774 |
| C | 3.468234  | 1.310482  | -2.065866 |
| C | -2.089146 | -1.924423 | -1.013015 |
| C | 2.759921  | 2.499391  | -2.017744 |
| C | -1.732329 | -2.729122 | 0.221411  |
| C | 2.568544  | 3.216575  | -0.742323 |
| C | -1.764620 | -1.781765 | 1.437090  |
| C | 3.099254  | 2.724809  | 0.443255  |
| C | -2.462819 | -0.598400 | 1.458663  |
| C | 2.528853  | 1.502355  | 2.366195  |
| C | -2.203084 | 1.742660  | 1.492043  |
| C | 1.489028  | 0.888627  | 3.073504  |
| C | -1.288657 | 2.805162  | 1.569891  |
| C | 1.350052  | -0.548400 | 3.025306  |
| C | -0.953790 | 3.540576  | 0.372279  |
| C | 2.257546  | -1.300337 | 2.272958  |
| C | -1.555416 | 3.182786  | -0.839626 |
| C | 1.773009  | -2.400777 | 1.456264  |
| C | -0.765742 | 3.144742  | -2.062672 |
| C | 2.554486  | -2.443020 | 0.244090  |
| C | -1.252456 | 2.048769  | -2.887049 |
| C | 1.927550  | -2.787906 | -0.959487 |
| C | -0.350945 | 1.292358  | -3.644238 |
| C | 2.253971  | -2.060151 | -2.165476 |
| C | -0.498411 | -0.151645 | -3.704109 |
| C | 3.183333  | -1.019900 | -2.105138 |
| C | -1.538484 | -0.771592 | -3.002455 |
| C | 2.946420  | 0.207080  | -2.843004 |
| C | -1.293412 | -1.988186 | -2.251503 |
| C | 1.794847  | 0.344445  | -3.618883 |
| C | -0.034806 | -2.555913 | -2.246823 |
| C | 0.825917  | -0.740098 | -3.687710 |
| C | 1.050489  | -1.919547 | -2.968837 |
| C | 1.070725  | 1.598391  | -3.594320 |
| C | 0.514981  | -3.102280 | -0.984934 |
| C | 1.538348  | 2.643908  | -2.794395 |
| C | -0.226860 | -3.074934 | 0.176590  |
| C | 0.598375  | 3.433872  | -2.018210 |
| C | 0.403355  | -2.692391 | 1.406195  |
| C | 1.233553  | 3.785071  | -0.756304 |
| C | -0.540748 | -1.903796 | 2.182161  |
| C | 0.468566  | 3.846040  | 0.411794  |
| C | -0.072196 | -0.858252 | 2.985378  |
| C | 1.006295  | 3.301453  | 1.640271  |
| C | -0.804348 | 0.384741  | 3.010957  |
| C | -0.076951 | 2.656466  | 2.361729  |
| C | 0.158074  | 1.474060  | 3.062650  |
| C | 2.283444  | 2.730569  | 1.635111  |
| C | -1.954721 | 0.508912  | 2.223393  |
| C | 5.354126  | 1.397324  | -0.157042 |
| C | 6.339100  | 0.453904  | 0.482306  |

|   |           |           |           |
|---|-----------|-----------|-----------|
| C | 6.985470  | -0.507345 | -0.302862 |
| C | 7.916886  | -1.376295 | 0.264045  |
| C | 8.213677  | -1.290349 | 1.626046  |
| C | 7.579689  | -0.327969 | 2.413564  |
| C | 6.645828  | 0.538761  | 1.844091  |
| H | 6.141989  | 1.275233  | 2.462253  |
| H | 7.805100  | -0.254755 | 3.473454  |
| H | 8.933620  | -1.971148 | 2.070892  |
| H | 8.401687  | -2.125130 | -0.355097 |
| H | 6.742984  | -0.585527 | -1.358877 |
| C | 5.978381  | 2.654862  | -0.758396 |
| C | 6.508066  | 3.611723  | 0.311204  |
| C | 7.085020  | 4.884616  | -0.302401 |
| C | 7.603019  | 5.851527  | 0.740069  |
| O | 7.585786  | 5.672033  | 1.941430  |
| O | 8.097763  | 6.965280  | 0.162482  |
| C | 8.617686  | 7.956724  | 1.066783  |
| H | 7.835457  | 8.300439  | 1.748046  |
| H | 9.446248  | 7.545871  | 1.648916  |
| H | 8.962680  | 8.775561  | 0.436053  |
| H | 7.908872  | 4.655888  | -0.990723 |
| H | 6.332440  | 5.409655  | -0.904859 |
| H | 7.274797  | 3.116938  | 0.915691  |
| H | 5.695641  | 3.877446  | 0.997323  |
| H | 5.243096  | 3.174087  | -1.380317 |
| H | 6.789679  | 2.342350  | -1.427518 |
| C | -4.834898 | -0.261606 | 0.415526  |
| H | -5.142748 | 0.181349  | 1.366729  |
| H | -5.043549 | -1.332302 | 0.455600  |
| C | -5.549036 | 0.409804  | -0.728747 |
| C | -5.815189 | -0.260992 | -1.932739 |
| C | -6.315238 | 0.454996  | -3.027629 |
| C | -6.503036 | 1.833935  | -2.948568 |
| C | -6.220907 | 2.511938  | -1.759991 |
| C | -5.790730 | 1.782333  | -0.649712 |
| O | -5.549227 | -1.607594 | -1.967275 |
| H | -6.527318 | -0.053628 | -3.960893 |
| H | -6.842523 | 2.397086  | -3.812042 |
| O | -6.338279 | 3.876757  | -1.756355 |
| H | -5.569555 | 2.287503  | 0.281799  |
| C | -5.171069 | -2.172038 | -3.228164 |
| C | -5.547279 | 4.567589  | -0.778546 |
| C | -5.280207 | 5.988604  | -1.242961 |
| C | -4.650812 | -3.580567 | -2.989291 |
| C | -4.221152 | 6.648752  | -0.353633 |
| H | -4.921677 | 5.954525  | -2.279579 |
| H | -6.209466 | 6.572413  | -1.242120 |
| H | -6.061791 | 4.561455  | 0.192109  |
| H | -4.593244 | 4.040996  | -0.655888 |
| H | -4.399148 | -1.539230 | -3.686621 |
| H | -6.034260 | -2.199760 | -3.906930 |
| C | -4.103874 | -4.203059 | -4.280768 |
| H | -3.871599 | -3.535239 | -2.223336 |
| H | -5.463339 | -4.198356 | -2.584717 |
| H | -3.193653 | -3.666998 | -4.580722 |
| H | -4.830693 | -4.044272 | -5.089653 |
| C | -3.825676 | -5.710950 | -4.177689 |
| C | -3.914526 | 8.099369  | -0.742097 |
| C | -2.706433 | 8.697782  | 0.008611  |
| H | -3.735630 | 8.157547  | -1.825503 |

|   |           |           |           |
|---|-----------|-----------|-----------|
| H | -4.810385 | 8.704847  | -0.552864 |
| C | -1.374444 | 8.615850  | -0.753314 |
| H | -1.461413 | 9.207785  | -1.676698 |
| H | -0.594926 | 9.105891  | -0.152445 |
| C | -0.894068 | 7.207114  | -1.121677 |
| H | -4.548728 | 6.623843  | 0.696091  |
| H | -3.303218 | 6.049178  | -0.396482 |
| H | -2.602867 | 8.200475  | 0.983872  |
| H | -2.900714 | 9.754953  | 0.229182  |
| C | -2.718432 | -6.119700 | -3.194602 |
| H | -2.934846 | -5.704861 | -2.201428 |
| H | -2.745865 | -7.211099 | -3.071680 |
| C | -1.304639 | -5.714692 | -3.626391 |
| H | -3.567183 | -6.091435 | -5.175577 |
| H | -4.759134 | -6.214131 | -3.890336 |
| H | -1.631308 | 6.717916  | -1.771187 |
| C | 0.462055  | 7.229647  | -1.831730 |
| H | 0.417372  | 7.842024  | -2.741011 |
| H | 0.780643  | 6.223331  | -2.119623 |
| H | 1.238559  | 7.655063  | -1.184002 |
| C | -0.224156 | -6.149120 | -2.629160 |
| C | 1.199836  | -5.877287 | -3.120203 |
| H | -1.091419 | -6.159807 | -4.609528 |
| H | -1.244706 | -4.627382 | -3.761345 |
| H | -0.383233 | -5.623223 | -1.678779 |
| H | -0.338776 | -7.220395 | -2.411501 |
| H | 1.944376  | -6.159383 | -2.367285 |
| H | 1.344833  | -4.815745 | -3.349110 |
| H | 1.414783  | -6.444374 | -4.034031 |
| H | -0.825499 | 6.588765  | -0.216129 |
| C | -2.624433 | -4.002849 | 0.395908  |
| H | -2.526418 | -4.598066 | -0.515703 |
| H | -3.664168 | -3.679663 | 0.477115  |
| C | -2.201442 | -4.816105 | 1.590432  |
| C | -2.720847 | -4.541570 | 2.867518  |
| C | -2.222199 | -5.222104 | 3.982702  |
| C | -1.204748 | -6.164287 | 3.832482  |
| C | -0.689013 | -6.453646 | 2.567705  |
| C | -1.201784 | -5.780704 | 1.454969  |
| O | -3.709279 | -3.597318 | 2.925464  |
| H | -2.613690 | -5.015674 | 4.972098  |
| H | -0.802021 | -6.685093 | 4.695219  |
| O | 0.273330  | -7.431387 | 2.491293  |
| H | -0.817579 | -5.987887 | 0.463063  |
| C | -3.974557 | -2.951510 | 4.174513  |
| C | 1.319871  | -7.277747 | 1.520832  |
| C | 2.314523  | -6.188569 | 1.909621  |
| C | -4.868170 | -1.761784 | 3.868007  |
| C | 3.458630  | -6.064180 | 0.896090  |
| H | 1.790711  | -5.229588 | 2.001825  |
| H | 2.714774  | -6.428405 | 2.903403  |
| H | 1.812221  | -8.254181 | 1.495793  |
| H | 0.905749  | -7.097073 | 0.521075  |
| H | -3.026445 | -2.623917 | 4.622765  |
| H | -4.458388 | -3.651432 | 4.869851  |
| C | -5.216677 | -0.906894 | 5.092178  |
| H | -4.345125 | -1.155196 | 3.124516  |
| H | -5.788782 | -2.119191 | 3.389626  |
| H | -4.308247 | -0.708719 | 5.679324  |
| H | -5.894054 | -1.467101 | 5.749256  |

|   |           |           |           |
|---|-----------|-----------|-----------|
| C | -5.857202 | 0.434244  | 4.690230  |
| C | 4.581274  | -5.135903 | 1.380660  |
| C | 5.851889  | -5.104284 | 0.512256  |
| H | 4.192579  | -4.116868 | 1.496972  |
| H | 4.869837  | -5.465227 | 2.388775  |
| C | 5.808108  | -4.269529 | -0.777715 |
| H | 5.537474  | -3.235385 | -0.529635 |
| H | 6.833073  | -4.222172 | -1.174878 |
| C | 4.889236  | -4.777811 | -1.895520 |
| H | 3.883580  | -7.060085 | 0.701333  |
| H | 3.051659  | -5.711860 | -0.057746 |
| H | 6.144040  | -6.136383 | 0.266276  |
| H | 6.664641  | -4.699137 | 1.130111  |
| C | -4.829659 | 1.434462  | 4.137273  |
| H | -4.240939 | 1.845810  | 4.969656  |
| H | -4.111952 | 0.898528  | 3.508339  |
| C | -5.421992 | 2.581224  | 3.311033  |
| H | -6.374775 | 0.871246  | 5.552493  |
| H | -6.631380 | 0.245374  | 3.931702  |
| H | 3.842009  | -4.640905 | -1.609716 |
| C | 5.135025  | -4.057950 | -3.224020 |
| H | 5.005089  | -2.975583 | -3.111864 |
| H | 4.436430  | -4.396172 | -3.998086 |
| H | 6.154731  | -4.236533 | -3.587342 |
| C | -6.298508 | 3.558698  | 4.099643  |
| C | -6.821112 | 4.705065  | 3.229932  |
| H | -4.600553 | 3.139425  | 2.839140  |
| H | -6.016810 | 2.158510  | 2.487651  |
| H | -7.145972 | 3.020623  | 4.544099  |
| H | -5.717580 | 3.965688  | 4.939240  |
| H | -5.991677 | 5.277473  | 2.795313  |
| H | -7.442043 | 5.400583  | 3.805604  |
| H | -7.429044 | 4.322680  | 2.400407  |
| H | 5.035846  | -5.858967 | -2.030051 |

---

**PPCBMB** (*singlet*) B3LYP-6-31G\* E= -5347.946194 u.a.

---

|   | X        | Y         | Z         |
|---|----------|-----------|-----------|
| C | 5.785181 | -0.809726 | 2.554782  |
| C | 6.441276 | -1.042925 | 1.345374  |
| C | 7.804008 | -1.371895 | 1.337158  |
| C | 8.504900 | -1.451661 | 2.542899  |
| C | 7.847155 | -1.200123 | 3.745065  |
| C | 6.484051 | -0.877002 | 3.764746  |
| C | 5.695477 | -0.910798 | 0.030890  |
| C | 4.591721 | -1.899343 | -0.143421 |
| C | 3.158293 | -1.514513 | -0.362185 |
| C | 2.380633 | -2.897358 | -0.451125 |
| C | 3.499954 | -3.959924 | -0.254566 |
| N | 4.748830 | -3.208141 | -0.115160 |
| C | 2.725583 | -0.569112 | 0.763153  |
| C | 2.737585 | 0.764669  | 0.257048  |
| C | 2.956324 | 0.723227  | -1.176769 |
| C | 3.096670 | -0.625853 | -1.605649 |
| C | 2.546310 | -1.050760 | -2.823064 |

|   |           |           |           |
|---|-----------|-----------|-----------|
| C | 1.874291  | -0.086598 | -3.657938 |
| C | 1.767449  | 1.267326  | -3.269074 |
| C | 2.323220  | 1.689645  | -1.989705 |
| C | 1.905478  | 1.761818  | 0.804431  |
| C | 1.274778  | 2.732220  | -0.052249 |
| C | 1.520071  | 2.713384  | -1.430941 |
| C | 0.490201  | 3.153207  | -2.477661 |
| C | 0.578990  | 2.009638  | -3.500945 |
| C | 1.613047  | -3.099260 | -1.769870 |
| C | 1.782049  | -2.294994 | -2.888249 |
| C | 0.660210  | -2.084280 | -3.789841 |
| C | 0.723909  | -0.717275 | -4.271949 |
| C | -0.450713 | 0.014848  | -4.473172 |
| C | -0.530073 | 1.411843  | -4.085306 |
| C | -0.973283 | 3.407366  | -1.888375 |
| C | -1.131279 | 3.162167  | -0.379474 |
| C | -0.061790 | 2.973358  | 0.478070  |
| C | -0.239236 | 2.136263  | 1.658930  |
| C | 0.988841  | 1.395170  | 1.867003  |
| C | 0.950118  | 0.070251  | 2.323144  |
| C | 1.836332  | -0.938289 | 1.770329  |
| C | 1.087981  | -2.187948 | 1.666367  |
| C | 1.257080  | -3.046049 | 0.583411  |
| C | 0.119714  | -3.621531 | -0.051440 |
| C | 0.335424  | -3.665331 | -1.485925 |
| C | -0.761269 | -3.486981 | -2.352838 |
| C | -0.583421 | -2.671113 | -3.528481 |
| C | -1.807742 | -1.917956 | -3.734875 |
| C | -1.738302 | -0.601742 | -4.197530 |
| C | -2.598398 | 0.409667  | -3.627643 |
| C | -1.868094 | 1.657229  | -3.556641 |
| C | -2.079861 | 2.519927  | -2.478408 |
| C | -1.258057 | 4.842084  | -2.257251 |
| N | -0.317985 | 5.348533  | -3.026043 |
| C | 0.872840  | 4.506685  | -3.132366 |
| C | -2.752614 | -2.292701 | -2.690209 |
| C | -3.606170 | -1.324343 | -2.162541 |
| C | -3.495737 | 0.035893  | -2.609880 |
| C | -2.095016 | -3.275149 | -1.828323 |
| C | -2.304461 | -3.278576 | -0.444346 |
| C | -3.300398 | -2.393998 | 0.224882  |
| C | -4.035780 | -1.308815 | -0.727833 |
| C | -2.598261 | -1.827652 | 1.414675  |
| C | -2.685965 | -0.491699 | 1.791214  |
| C | -3.344002 | 0.490468  | 0.925483  |
| C | -3.908925 | 0.110611  | -0.293119 |
| C | -3.664799 | 0.905163  | -1.465199 |
| C | -1.182916 | -3.409367 | 0.435438  |
| C | -1.364198 | -2.540980 | 1.578822  |
| C | -0.246518 | -1.934385 | 2.170240  |
| C | -0.336941 | -0.555452 | 2.583351  |
| C | -1.526969 | 0.153703  | 2.389914  |
| C | -1.473993 | 1.525500  | 1.913936  |
| C | -2.578965 | 1.717621  | 1.007296  |
| C | -2.378756 | 2.516928  | -0.137906 |
| C | -2.940803 | 2.108277  | -1.407063 |
| C | -4.786585 | -2.404049 | -0.000434 |
| C | -5.352210 | -3.551900 | -0.834696 |
| C | -5.355041 | -4.878539 | -0.072747 |
| C | -5.877054 | -6.024362 | -0.934275 |

|   |           |           |           |
|---|-----------|-----------|-----------|
| C | -5.899708 | -7.346446 | -0.198815 |
| O | -6.337287 | -8.342811 | -1.007034 |
| C | -6.395743 | -9.638843 | -0.395062 |
| C | -2.411163 | 5.653034  | -1.749112 |
| C | -2.349803 | 5.889727  | -0.244043 |
| C | -1.183196 | 6.330687  | 0.393798  |
| C | -1.144163 | 6.380587  | 1.790768  |
| C | -2.263431 | 6.045494  | 2.543257  |
| C | -3.451701 | 5.657364  | 1.913907  |
| C | -3.477018 | 5.577086  | 0.519392  |
| O | -0.100686 | 6.609479  | -0.413203 |
| C | 0.898259  | 7.552121  | 0.009612  |
| C | 2.272837  | 6.902523  | 0.110072  |
| C | 2.408110  | 5.870705  | 1.232659  |
| C | 3.828298  | 5.308970  | 1.409442  |
| C | 4.404207  | 4.593514  | 0.180468  |
| C | 5.811562  | 4.018027  | 0.394202  |
| C | 5.918646  | 2.926468  | 1.466802  |
| C | 7.329792  | 2.340086  | 1.557722  |
| O | -4.507091 | 5.373114  | 2.728237  |
| C | -5.767293 | 5.103549  | 2.107839  |
| C | -5.879884 | 3.695752  | 1.511720  |
| C | -6.942407 | 3.647418  | 0.408230  |
| C | -7.100986 | 2.262321  | -0.218658 |
| C | -8.084912 | 2.245148  | -1.394208 |
| C | -8.308362 | 0.856994  | -2.011878 |
| C | -7.051276 | 0.239689  | -2.634747 |
| C | -7.295961 | -1.135863 | -3.255711 |
| C | -0.272021 | 6.715123  | -3.530322 |
| C | 5.981134  | -3.943156 | 0.128601  |
| O | 8.345523  | -1.618480 | 0.096571  |
| C | 9.733043  | -1.911599 | -0.036735 |
| C | 10.014812 | -2.094474 | -1.523695 |
| C | 9.299739  | -3.313112 | -2.162531 |
| C | 8.400865  | -2.985567 | -3.368820 |
| C | 7.186254  | -2.118401 | -3.016903 |
| C | 6.165909  | -1.917775 | -4.146883 |
| C | 5.245075  | -3.123383 | -4.369466 |
| C | 4.244255  | -2.900948 | -5.504732 |
| O | 5.942952  | -0.645612 | 4.992276  |
| C | 4.627508  | -0.083225 | 5.097929  |
| C | 3.518981  | -1.132894 | 5.125171  |
| C | 2.182936  | -0.519607 | 5.560253  |
| C | 1.050061  | -1.542869 | 5.693105  |
| C | -0.261090 | -0.901121 | 6.163882  |
| C | -1.405813 | -1.891957 | 6.422237  |
| C | -1.962731 | -2.569084 | 5.164952  |
| C | -3.120191 | -3.522203 | 5.468318  |
| C | -5.672041 | -2.011963 | 1.150850  |
| C | -6.795192 | -1.212596 | 0.919784  |
| C | -7.668691 | -0.895552 | 1.958455  |
| C | -7.427128 | -1.375943 | 3.247148  |
| C | -6.312563 | -2.180398 | 3.485213  |
| C | -5.442738 | -2.497642 | 2.441929  |
| O | -5.574865 | -7.522963 | 0.954949  |
| H | -0.228022 | 6.649433  | 2.301887  |
| H | -2.232104 | 6.073476  | 3.627133  |
| H | -4.357071 | 5.221405  | 0.000428  |
| H | -4.912334 | 3.387562  | 1.102386  |
| H | -6.112706 | 2.973935  | 2.303373  |

|   |           |            |           |
|---|-----------|------------|-----------|
| H | -6.503919 | 5.250497   | 2.902207  |
| H | -5.956745 | 5.866731   | 1.339486  |
| H | 0.602554  | 8.017316   | 0.954587  |
| H | 2.501159  | 6.439437   | -0.858143 |
| H | 3.008662  | 7.708534   | 0.248414  |
| H | 1.708685  | 5.049057   | 1.048858  |
| H | 2.102649  | 6.336769   | 2.180368  |
| H | -6.116617 | 1.911634   | -0.547485 |
| H | -7.430238 | 1.554292   | 0.552114  |
| H | -8.702942 | 0.177017   | -1.241651 |
| H | -9.091927 | 0.926614   | -2.779467 |
| H | -7.910711 | 3.989632   | 0.803610  |
| H | -6.669670 | 4.368442   | -0.378709 |
| H | -7.722905 | 2.931310   | -2.174539 |
| H | -9.051306 | 2.648197   | -1.058908 |
| H | 3.723914  | 3.791321   | -0.122072 |
| H | 4.445694  | 5.293218   | -0.665292 |
| H | 3.804325  | 4.609804   | 2.253748  |
| H | 4.508987  | 6.123095   | 1.702919  |
| H | -6.267967 | 0.151902   | -1.876912 |
| H | -8.015746 | -1.081356  | -4.081750 |
| H | 6.166306  | 3.603047   | -0.560087 |
| H | 6.506413  | 4.833410   | 0.647089  |
| H | 5.633385  | 3.333093   | 2.445538  |
| H | 5.192915  | 2.130802   | 1.249984  |
| H | 7.616312  | 1.853525   | 0.616883  |
| H | 7.407194  | 1.593496   | 2.352987  |
| H | 8.066483  | 3.128029   | 1.759066  |
| H | -6.648061 | 0.923252   | -3.394681 |
| H | -3.333347 | 5.106719   | -1.967326 |
| H | -2.464520 | 6.603234   | -2.289380 |
| H | -4.574227 | -3.118582  | 2.632384  |
| H | -6.114290 | -2.563304  | 4.482124  |
| H | -8.104626 | -1.126290  | 4.059024  |
| H | -8.537535 | -0.273229  | 1.760927  |
| H | -6.977551 | -0.834863  | -0.079162 |
| H | -5.404704 | -9.948135  | -0.051788 |
| H | -7.077175 | -9.630990  | 0.460119  |
| H | -6.760829 | -10.313786 | -1.169884 |
| H | -6.895815 | -5.821604  | -1.292073 |
| H | -5.267531 | -6.149885  | -1.838681 |
| H | -5.962682 | -4.796332  | 0.834267  |
| H | -4.335997 | -5.109748  | 0.257502  |
| H | -4.774477 | -3.660831  | -1.756772 |
| H | -6.372912 | -3.284086  | -1.134977 |
| H | -1.169596 | 6.938845   | -4.112311 |
| H | 0.597789  | 6.811824   | -4.181348 |
| H | 6.002425  | -4.298402  | 1.165266  |
| H | 6.846114  | -3.310653  | -0.054086 |
| H | 6.012921  | -4.803928  | -0.545753 |
| H | -0.187272 | 7.415126   | -2.695191 |
| H | 9.560115  | -1.699778  | 2.555429  |
| H | 8.382179  | -1.246059  | 4.687793  |
| H | 4.728527  | -0.570036  | 2.526392  |
| H | 3.407943  | -1.601975  | 4.139860  |
| H | 3.816462  | -1.923280  | 5.826457  |
| H | 4.643997  | 0.457879   | 6.049295  |
| H | 4.467435  | 0.653083   | 4.299712  |
| H | 9.977697  | -2.824562  | 0.526511  |
| H | 9.727201  | -1.167871  | -2.033892 |

|   |           |           |           |
|---|-----------|-----------|-----------|
| H | 11.100877 | -2.185809 | -1.643225 |
| H | 8.687858  | -3.814917 | -1.401939 |
| H | 10.050819 | -4.048681 | -2.474037 |
| H | 0.901033  | -2.043333 | 4.729476  |
| H | 1.348860  | -2.324808 | 6.407368  |
| H | -1.065497 | -2.662558 | 7.130844  |
| H | -2.226194 | -1.360023 | 6.925089  |
| H | 2.319186  | -0.009088 | 6.525469  |
| H | 1.884754  | 0.253519  | 4.839923  |
| H | -0.584672 | -0.160270 | 5.420462  |
| H | -0.061597 | -0.342553 | 7.089786  |
| H | 6.667174  | -2.579400 | -2.169135 |
| H | 7.536673  | -1.141219 | -2.662867 |
| H | 8.059529  | -3.930418 | -3.811455 |
| H | 8.995437  | -2.482978 | -4.145196 |
| H | -1.166360 | -3.118635 | 4.649972  |
| H | -2.814633 | -4.313236 | 6.164631  |
| H | -3.486809 | -4.007450 | 4.556666  |
| H | -3.961865 | -2.987067 | 5.926151  |
| H | 5.533811  | -1.052845 | -3.906983 |
| H | 6.688652  | -1.670531 | -5.082406 |
| H | 5.841243  | -4.024330 | -4.571170 |
| H | 4.692473  | -3.316172 | -3.438482 |
| H | 3.631777  | -2.014058 | -5.311214 |
| H | 3.565893  | -3.753962 | -5.613836 |
| H | 4.760342  | -2.754380 | -6.461666 |
| H | -2.302039 | -1.799365 | 4.461443  |
| H | 5.258854  | 0.085924  | -0.053255 |
| H | 6.407639  | -1.011467 | -0.788903 |
| H | 10.326221 | -1.085322 | 0.378337  |
| H | -6.364051 | -1.563394 | -3.640698 |
| H | -7.700519 | -1.834757 | -2.512683 |
| H | 0.914374  | 8.341794  | -0.753534 |
| H | 3.581438  | -4.634455 | -1.112799 |
| H | 3.338220  | -4.561329 | 0.646787  |
| H | 1.693674  | 4.995660  | -2.594279 |
| H | 1.157013  | 4.393216  | -4.182084 |

---

**PPCBMB** xylene (*singlet*) B3LYP-6-31G\* E= -5347.960959 u.a.

---

|   | X        | Y         | Z         |
|---|----------|-----------|-----------|
| C | 5.803237 | -0.797979 | 2.554007  |
| C | 6.453249 | -1.039233 | 1.342694  |
| C | 7.816230 | -1.369214 | 1.328523  |
| C | 8.522054 | -1.446118 | 2.532102  |
| C | 7.870018 | -1.188100 | 3.736184  |
| C | 6.508092 | -0.861033 | 3.760394  |
| C | 5.702171 | -0.912222 | 0.031182  |
| C | 4.600240 | -1.905268 | -0.137260 |
| C | 3.166158 | -1.517621 | -0.354699 |
| C | 2.387158 | -2.900277 | -0.437564 |
| C | 3.506658 | -3.962697 | -0.241615 |
| N | 4.756303 | -3.208987 | -0.104893 |
| C | 2.734674 | -0.566983 | 0.767824  |
| C | 2.745643 | 0.763775  | 0.257149  |



|   |           |           |           |
|---|-----------|-----------|-----------|
| C | 2.960888  | 0.716439  | -1.177657 |
| C | 3.102881  | -0.632222 | -1.601703 |
| C | 2.548494  | -1.062431 | -2.817469 |
| C | 1.874258  | -0.100864 | -3.653411 |
| C | 1.767227  | 1.254471  | -3.269002 |
| C | 2.326184  | 1.681980  | -1.991978 |
| C | 1.914919  | 1.764347  | 0.801616  |
| C | 1.283732  | 2.732884  | -0.056129 |
| C | 1.525381  | 2.707079  | -1.436155 |
| C | 0.493807  | 3.144292  | -2.482721 |
| C | 0.579086  | 1.996039  | -3.501150 |
| C | 1.616655  | -3.105531 | -1.754444 |
| C | 1.785834  | -2.306117 | -2.878079 |
| C | 0.660804  | -2.098472 | -3.777074 |
| C | 0.722772  | -0.732983 | -4.264040 |
| C | -0.452390 | -0.001076 | -4.465408 |
| C | -0.531616 | 1.397790  | -4.083358 |
| C | -0.968731 | 3.403122  | -1.891599 |
| C | -1.124693 | 3.161196  | -0.380817 |
| C | -0.052269 | 2.974539  | 0.474356  |
| C | -0.228300 | 2.141707  | 1.658031  |
| C | 1.000150  | 1.400825  | 1.866528  |
| C | 0.962067  | 0.078288  | 2.328510  |
| C | 1.847039  | -0.933156 | 1.778205  |
| C | 1.099064  | -2.182737 | 1.682140  |
| C | 1.265801  | -3.045251 | 0.599955  |
| C | 0.127858  | -3.620287 | -0.030494 |
| C | 0.340828  | -3.669882 | -1.466481 |
| C | -0.759092 | -3.495946 | -2.332034 |
| C | -0.582780 | -2.684363 | -3.511415 |
| C | -1.807550 | -1.931936 | -3.717624 |
| C | -1.739230 | -0.616961 | -4.184676 |
| C | -2.597796 | 0.396794  | -3.616224 |
| C | -1.868174 | 1.644641  | -3.551365 |
| C | -2.079276 | 2.512583  | -2.475778 |
| C | -1.244628 | 4.841980  | -2.260224 |
| N | -0.306850 | 5.345100  | -3.020261 |
| C | 0.876096  | 4.493613  | -3.146549 |
| C | -2.750112 | -2.303842 | -2.669048 |
| C | -3.602951 | -1.332363 | -2.143106 |
| C | -3.492976 | 0.025573  | -2.594756 |
| C | -2.091603 | -3.283500 | -1.806488 |
| C | -2.298259 | -3.281798 | -0.419684 |
| C | -3.292090 | -2.393468 | 0.247565  |
| C | -4.029522 | -1.310827 | -0.707167 |
| C | -2.588793 | -1.822502 | 1.435186  |
| C | -2.676146 | -0.483969 | 1.806346  |
| C | -3.336026 | 0.495041  | 0.939874  |
| C | -3.904153 | 0.110445  | -0.277884 |
| C | -3.660282 | 0.899339  | -1.452406 |
| C | -1.175369 | -3.406751 | 0.457087  |
| C | -1.354648 | -2.534539 | 1.598954  |
| C | -0.234372 | -1.926472 | 2.185865  |
| C | -0.324526 | -0.545716 | 2.593720  |
| C | -1.514917 | 0.162726  | 2.400337  |
| C | -1.462622 | 1.532511  | 1.918848  |
| C | -2.569976 | 1.721538  | 1.014228  |
| C | -2.370580 | 2.516849  | -0.134400 |
| C | -2.934619 | 2.102660  | -1.401579 |
| C | -4.778760 | -2.404670 | 0.024140  |

|   |           |           |           |
|---|-----------|-----------|-----------|
| C | -5.345893 | -3.554035 | -0.807136 |
| C | -5.349426 | -4.879954 | -0.044231 |
| C | -5.877847 | -6.023510 | -0.905894 |
| C | -5.911504 | -7.346449 | -0.173207 |
| O | -6.363407 | -8.333756 | -0.978885 |
| C | -6.434822 | -9.636448 | -0.376524 |
| C | -2.406232 | 5.652506  | -1.770761 |
| C | -2.373577 | 5.873358  | -0.263068 |
| C | -1.216187 | 6.303085  | 0.399322  |
| C | -1.205519 | 6.351093  | 1.797161  |
| C | -2.343568 | 6.025097  | 2.525343  |
| C | -3.520945 | 5.645188  | 1.870260  |
| C | -3.518967 | 5.566759  | 0.475450  |
| O | -0.112505 | 6.563334  | -0.380897 |
| C | 0.867136  | 7.530368  | 0.041121  |
| C | 2.249715  | 6.897957  | 0.131919  |
| C | 2.389934  | 5.858212  | 1.247085  |
| C | 3.811163  | 5.298863  | 1.421917  |
| C | 4.387547  | 4.595625  | 0.185933  |
| C | 5.795917  | 4.018812  | 0.391225  |
| C | 5.904696  | 2.915339  | 1.451531  |
| C | 7.313825  | 2.321528  | 1.527971  |
| O | -4.595770 | 5.365598  | 2.663140  |
| C | -5.844247 | 5.095144  | 2.016131  |
| C | -5.945576 | 3.681517  | 1.433402  |
| C | -6.997360 | 3.616839  | 0.320575  |
| C | -7.139534 | 2.223537  | -0.292023 |
| C | -8.107748 | 2.183397  | -1.479669 |
| C | -8.314262 | 0.783678  | -2.076768 |
| C | -7.043939 | 0.163497  | -2.668608 |
| C | -7.273727 | -1.218960 | -3.280076 |
| C | -0.257420 | 6.711105  | -3.534915 |
| C | 5.990821  | -3.947661 | 0.129265  |
| O | 8.352827  | -1.616257 | 0.088369  |
| C | 9.740687  | -1.922206 | -0.046638 |
| C | 10.021773 | -2.102028 | -1.533456 |
| C | 9.301437  | -3.314033 | -2.178514 |
| C | 8.406768  | -2.975243 | -3.384540 |
| C | 7.194386  | -2.107170 | -3.027878 |
| C | 6.186929  | -1.876963 | -4.163500 |
| C | 5.274817  | -3.079207 | -4.434401 |
| C | 4.280710  | -2.823821 | -5.568889 |
| O | 5.972729  | -0.619684 | 4.990860  |
| C | 4.660741  | -0.047833 | 5.097290  |
| C | 3.545818  | -1.090419 | 5.133891  |
| C | 2.213518  | -0.463309 | 5.560668  |
| C | 1.074653  | -1.477665 | 5.709780  |
| C | -0.231221 | -0.820551 | 6.173986  |
| C | -1.382943 | -1.798896 | 6.448734  |
| C | -1.946934 | -2.490105 | 5.202381  |
| C | -3.115574 | -3.425150 | 5.520163  |
| C | -5.663650 | -2.010723 | 1.175566  |
| C | -6.782366 | -1.204051 | 0.946817  |
| C | -7.655128 | -0.885964 | 1.986352  |
| C | -7.417574 | -1.372969 | 3.273576  |
| C | -6.307284 | -2.184729 | 3.509513  |
| C | -5.438136 | -2.502346 | 2.465499  |
| O | -5.585355 | -7.527846 | 0.981681  |
| H | -0.297690 | 6.613265  | 2.326768  |
| H | -2.333786 | 6.052817  | 3.609777  |

|   |           |            |           |
|---|-----------|------------|-----------|
| H | -4.391699 | 5.222738   | -0.063252 |
| H | -4.972996 | 3.373428   | 1.035537  |
| H | -6.183959 | 2.967463   | 2.230520  |
| H | -6.598127 | 5.251386   | 2.792073  |
| H | -6.013252 | 5.851098   | 1.236646  |
| H | 0.569729  | 7.979753   | 0.992705  |
| H | 2.485031  | 6.447091   | -0.840301 |
| H | 2.975212  | 7.711011   | 0.280071  |
| H | 1.694800  | 5.034489   | 1.055529  |
| H | 2.079728  | 6.316291   | 2.197208  |
| H | -6.148669 | 1.874100   | -0.603430 |
| H | -7.475780 | 1.523681   | 0.483106  |
| H | -8.716484 | 0.114598   | -1.300885 |
| H | -9.085481 | 0.835565   | -2.858214 |
| H | -7.971201 | 3.954937   | 0.704931  |
| H | -6.722205 | 4.331685   | -0.470702 |
| H | -7.739060 | 2.858763   | -2.266193 |
| H | -9.080691 | 2.585842   | -1.163380 |
| H | 3.708024  | 3.795216   | -0.124188 |
| H | 4.427410  | 5.304531   | -0.652027 |
| H | 3.790541  | 4.593422   | 2.261331  |
| H | 4.489397  | 6.113020   | 1.720470  |
| H | -6.274778 | 0.085658   | -1.895001 |
| H | -7.979045 | -1.174192  | -4.119110 |
| H | 6.150287  | 3.615090   | -0.568176 |
| H | 6.489718  | 4.832277   | 0.652774  |
| H | 5.628439  | 3.314069   | 2.436137  |
| H | 5.174762  | 2.124141   | 1.231112  |
| H | 7.589329  | 1.835897   | 0.583479  |
| H | 7.394189  | 1.571987   | 2.320390  |
| H | 8.056211  | 3.105449   | 1.724873  |
| H | -6.628465 | 0.840295   | -3.428182 |
| H | -3.324590 | 5.111419   | -2.015127 |
| H | -2.442215 | 6.607086   | -2.303170 |
| H | -4.571982 | -3.127253  | 2.654011  |
| H | -6.112567 | -2.572185  | 4.505393  |
| H | -8.093868 | -1.122067  | 4.086004  |
| H | -8.519688 | -0.257112  | 1.791316  |
| H | -6.962238 | -0.821207  | -0.050920 |
| H | -5.444013 | -9.962850  | -0.050066 |
| H | -7.107601 | -9.625002  | 0.484904  |
| H | -6.818618 | -10.298083 | -1.153135 |
| H | -6.893988 | -5.813072  | -1.265485 |
| H | -5.267076 | -6.152755  | -1.808873 |
| H | -5.954959 | -4.795701  | 0.863926  |
| H | -4.329713 | -5.112397  | 0.282709  |
| H | -4.768680 | -3.665454  | -1.729168 |
| H | -6.366519 | -3.286680  | -1.107610 |
| H | -1.162687 | 6.937307   | -4.101660 |
| H | 0.602690  | 6.796187   | -4.199033 |
| H | 6.014181  | -4.303075  | 1.164924  |
| H | 6.855005  | -3.316131  | -0.059409 |
| H | 6.013647  | -4.807489  | -0.545520 |
| H | -0.153057 | 7.411781   | -2.703367 |
| H | 9.576653  | -1.696098  | 2.540887  |
| H | 8.410756  | -1.231730  | 4.675899  |
| H | 4.747384  | -0.554257  | 2.529861  |
| H | 3.433409  | -1.569649  | 4.153622  |
| H | 3.836176  | -1.874806  | 5.844938  |
| H | 4.682916  | 0.498397   | 6.045516  |

|   |           |           |           |
|---|-----------|-----------|-----------|
| H | 4.503556  | 0.684875  | 4.295543  |
| H | 9.974419  | -2.838694 | 0.514082  |
| H | 9.741963  | -1.171758 | -2.041565 |
| H | 11.107322 | -2.199884 | -1.650221 |
| H | 8.686241  | -3.817643 | -1.421851 |
| H | 10.049444 | -4.051122 | -2.493299 |
| H | 0.920312  | -1.990532 | 4.753407  |
| H | 1.369869  | -2.250957 | 6.434860  |
| H | -1.047389 | -2.561698 | 7.168030  |
| H | -2.198714 | -1.253286 | 6.944539  |
| H | 2.353730  | 0.060452  | 6.518034  |
| H | 1.919401  | 0.300730  | 4.829148  |
| H | -0.550875 | -0.088132 | 5.420505  |
| H | -0.025886 | -0.250404 | 7.091502  |
| H | 6.663728  | -2.580933 | -2.193978 |
| H | 7.548370  | -1.139198 | -2.653059 |
| H | 8.064149  | -3.915631 | -3.835496 |
| H | 9.004533  | -2.466991 | -4.154736 |
| H | -1.156432 | -3.056001 | 4.696268  |
| H | -2.818519 | -4.208657 | 6.228707  |
| H | -3.487872 | -3.920084 | 4.616030  |
| H | -3.951092 | -2.873356 | 5.969350  |
| H | 5.548351  | -1.022082 | -3.904366 |
| H | 6.719913  | -1.598865 | -5.084536 |
| H | 5.878165  | -3.968423 | -4.663325 |
| H | 4.717139  | -3.308162 | -3.514978 |
| H | 3.656779  | -1.951534 | -5.346057 |
| H | 3.613052  | -3.679747 | -5.717183 |
| H | 4.802498  | -2.634386 | -6.515224 |
| H | -2.276597 | -1.727625 | 4.486550  |
| H | 5.262442  | 0.082976  | -0.054676 |
| H | 6.410152  | -1.015559 | -0.791792 |
| H | 10.339565 | -1.102133 | 0.370930  |
| H | -6.333997 | -1.647606 | -3.644634 |
| H | -7.689177 | -1.911572 | -2.537281 |
| H | 0.863024  | 8.325643  | -0.715169 |
| H | 3.590180  | -4.638274 | -1.097874 |
| H | 3.350884  | -4.562874 | 0.660618  |
| H | 1.706337  | 4.982966  | -2.625397 |
| H | 1.139745  | 4.381507  | -4.201005 |

---

PPCBMB toluene (*singlet*) B3LYP-6-31G\* E= -5347.960874 u.a.

---

|   | X        | Y         | Z         |
|---|----------|-----------|-----------|
| C | 5.802813 | -0.798207 | 2.554291  |
| C | 6.452815 | -1.040046 | 1.343093  |
| C | 7.815689 | -1.370465 | 1.329128  |
| C | 8.521437 | -1.447169 | 2.532753  |
| C | 7.869436 | -1.188479 | 3.736709  |
| C | 6.507596 | -0.861010 | 3.760740  |
| C | 5.701923 | -0.913104 | 0.031468  |
| C | 4.599932 | -1.906042 | -0.137091 |
| C | 3.165910 | -1.518255 | -0.354639 |
| C | 2.386747 | -2.900819 | -0.437460 |
| C | 3.506132 | -3.963359 | -0.241490 |

|   |           |           |           |
|---|-----------|-----------|-----------|
| N | 4.755859  | -3.209803 | -0.104741 |
| C | 2.734518  | -0.567516 | 0.767813  |
| C | 2.745695  | 0.763222  | 0.257069  |
| C | 2.960971  | 0.715786  | -1.177727 |
| C | 3.102786  | -0.632926 | -1.601695 |
| C | 2.548383  | -1.063122 | -2.817456 |
| C | 1.874291  | -0.101512 | -3.653464 |
| C | 1.767439  | 1.253861  | -3.269133 |
| C | 2.326413  | 1.681367  | -1.992113 |
| C | 1.915105  | 1.763927  | 0.801473  |
| C | 1.284067  | 2.732513  | -0.056341 |
| C | 1.525735  | 2.706613  | -1.436362 |
| C | 0.494232  | 3.143886  | -2.482996 |
| C | 0.579397  | 1.995564  | -3.501342 |
| C | 1.616233  | -3.106031 | -1.754336 |
| C | 1.785539  | -2.306707 | -2.878002 |
| C | 0.660562  | -2.098960 | -3.777044 |
| C | 0.722728  | -0.733509 | -4.264080 |
| C | -0.452333 | -0.001455 | -4.465518 |
| C | -0.531376 | 1.397433  | -4.083530 |
| C | -0.968263 | 3.402923  | -1.891882 |
| C | -1.124269 | 3.161077  | -0.381101 |
| C | -0.051897 | 2.974376  | 0.474124  |
| C | -0.228074 | 2.141626  | 1.657829  |
| C | 1.000272  | 1.400589  | 1.866396  |
| C | 0.961989  | 0.078073  | 2.328425  |
| C | 1.846843  | -0.933516 | 1.778210  |
| C | 1.098689  | -2.183004 | 1.682170  |
| C | 1.265349  | -3.045599 | 0.600054  |
| C | 0.127326  | -3.620519 | -0.030398 |
| C | 0.340321  | -3.670211 | -1.466370 |
| C | -0.759548 | -3.496171 | -2.331962 |
| C | -0.583104 | -2.684674 | -3.511380 |
| C | -1.807772 | -1.932093 | -3.717662 |
| C | -1.739263 | -0.617153 | -4.184781 |
| C | -2.597703 | 0.396751  | -3.616397 |
| C | -1.867904 | 1.644507  | -3.551588 |
| C | -2.078920 | 2.512542  | -2.476061 |
| C | -1.243846 | 4.841880  | -2.260266 |
| N | -0.305929 | 5.344979  | -3.020191 |
| C | 0.876670  | 4.493112  | -3.146978 |
| C | -2.750410 | -2.303812 | -2.669091 |
| C | -3.603124 | -1.332195 | -2.143219 |
| C | -3.492951 | 0.025710  | -2.594935 |
| C | -2.092044 | -3.283510 | -1.806447 |
| C | -2.298732 | -3.281701 | -0.419665 |
| C | -3.292471 | -2.393214 | 0.247526  |
| C | -4.029740 | -1.310537 | -0.707303 |
| C | -2.589102 | -1.822286 | 1.435121  |
| C | -2.676278 | -0.483724 | 1.806204  |
| C | -3.336008 | 0.495323  | 0.939666  |
| C | -3.904172 | 0.110745  | -0.278076 |
| C | -3.660159 | 0.899548  | -1.452632 |
| C | -1.175872 | -3.406785 | 0.457153  |
| C | -1.355064 | -2.534497 | 1.598971  |
| C | -0.234721 | -1.926540 | 2.185871  |
| C | -0.324692 | -0.545745 | 2.593635  |
| C | -1.514974 | 0.162852  | 2.400187  |
| C | -1.462486 | 1.532605  | 1.918639  |
| C | -2.569794 | 1.721724  | 1.013978  |

|   |           |           |           |
|---|-----------|-----------|-----------|
| C | -2.370261 | 2.516934  | -0.134691 |
| C | -2.934346 | 2.102778  | -1.401858 |
| C | -4.779138 | -2.404250 | 0.024026  |
| C | -5.346358 | -3.553605 | -0.807221 |
| C | -5.350124 | -4.879412 | -0.044119 |
| C | -5.878553 | -6.023108 | -0.905598 |
| C | -5.912161 | -7.345899 | -0.172617 |
| O | -6.365507 | -8.333114 | -0.977627 |
| C | -6.436668 | -9.635710 | -0.375045 |
| C | -2.405337 | 5.652537  | -1.770778 |
| C | -2.372773 | 5.873430  | -0.263077 |
| C | -1.215332 | 6.302849  | 0.399443  |
| C | -1.204728 | 6.350750  | 1.797273  |
| C | -2.342906 | 6.024993  | 2.525356  |
| C | -3.520328 | 5.645407  | 1.870167  |
| C | -3.518283 | 5.567052  | 0.475346  |
| O | -0.111428 | 6.562671  | -0.380640 |
| C | 0.868207  | 7.529762  | 0.041222  |
| C | 2.250798  | 6.897315  | 0.131686  |
| C | 2.391124  | 5.857595  | 1.246873  |
| C | 3.812299  | 5.298042  | 1.421464  |
| C | 4.388257  | 4.594476  | 0.185471  |
| C | 5.796598  | 4.017502  | 0.390498  |
| C | 5.905550  | 2.914356  | 1.451133  |
| C | 7.314577  | 2.320246  | 1.527183  |
| O | -4.595248 | 5.366013  | 2.662977  |
| C | -5.843742 | 5.095693  | 2.015961  |
| C | -5.945239 | 3.682048  | 1.433292  |
| C | -6.996962 | 3.617461  | 0.320410  |
| C | -7.139286 | 2.224183  | -0.292214 |
| C | -8.107245 | 2.184326  | -1.480073 |
| C | -8.313897 | 0.784722  | -2.077368 |
| C | -7.043511 | 0.164276  | -2.668791 |
| C | -7.273477 | -1.217988 | -3.280638 |
| C | -0.256278 | 6.711133  | -3.534406 |
| C | 5.990278  | -3.948603 | 0.129514  |
| O | 8.352219  | -1.618351 | 0.089114  |
| C | 9.740476  | -1.922331 | -0.046078 |
| C | 10.021656 | -2.101172 | -1.533012 |
| C | 9.302044  | -3.313336 | -2.178607 |
| C | 8.407261  | -2.974517 | -3.384548 |
| C | 7.194409  | -2.107247 | -3.027533 |
| C | 6.186855  | -1.876988 | -4.163065 |
| C | 5.274998  | -3.079369 | -4.434199 |
| C | 4.280858  | -2.823984 | -5.568657 |
| O | 5.972262  | -0.619015 | 4.991086  |
| C | 4.660337  | -0.046964 | 5.097280  |
| C | 3.545333  | -1.089455 | 5.134272  |
| C | 2.213064  | -0.462164 | 5.560849  |
| C | 1.074126  | -1.476423 | 5.710062  |
| C | -0.231780 | -0.819147 | 6.173949  |
| C | -1.383566 | -1.797397 | 6.448770  |
| C | -1.947468 | -2.488847 | 5.202512  |
| C | -3.116046 | -3.423924 | 5.520430  |
| C | -5.664102 | -2.010141 | 1.175354  |
| C | -6.782925 | -1.203678 | 0.946317  |
| C | -7.655769 | -0.885396 | 1.985721  |
| C | -7.418203 | -1.371995 | 3.273097  |
| C | -6.307828 | -2.183554 | 3.509315  |
| C | -5.438594 | -2.501378 | 2.465435  |

|   |           |            |           |
|---|-----------|------------|-----------|
| O | -5.584636 | -7.527302  | 0.981872  |
| H | -0.296841 | 6.612572   | 2.326968  |
| H | -2.333190 | 6.052624   | 3.609792  |
| H | -4.391036 | 5.223191   | -0.063424 |
| H | -4.972677 | 3.373820   | 1.035486  |
| H | -6.183738 | 2.968048   | 2.230424  |
| H | -6.597605 | 5.252057   | 2.791895  |
| H | -6.012663 | 5.851638   | 1.236444  |
| H | 0.571031  | 7.978991   | 0.992948  |
| H | 2.485834  | 6.446369   | -0.840569 |
| H | 2.976402  | 7.710310   | 0.279627  |
| H | 1.695827  | 5.033969   | 1.055496  |
| H | 2.081161  | 6.315776   | 2.197030  |
| H | -6.148432 | 1.874547   | -0.603424 |
| H | -7.475836 | 1.524357   | 0.482817  |
| H | -8.716593 | 0.115666   | -1.301707 |
| H | -9.084800 | 0.836889   | -2.859108 |
| H | -7.970785 | 3.955698   | 0.704689  |
| H | -6.721652 | 4.332262   | -0.470858 |
| H | -7.738238 | 2.859691   | -2.266448 |
| H | -9.080184 | 2.586934   | -1.163972 |
| H | 3.708541  | 3.794090   | -0.124291 |
| H | 4.427988  | 5.303196   | -0.652656 |
| H | 3.791759  | 4.592742   | 2.261003  |
| H | 4.490741  | 6.112134   | 1.719715  |
| H | -6.274705 | 0.086055   | -1.894856 |
| H | -7.978514 | -1.172865  | -4.119884 |
| H | 6.150589  | 3.613409   | -0.568888 |
| H | 6.490616  | 4.830937   | 0.651558  |
| H | 5.629779  | 3.313474   | 2.435719  |
| H | 5.175334  | 2.123266   | 1.231282  |
| H | 7.589484  | 1.834077   | 0.582792  |
| H | 7.395169  | 1.571094   | 2.319941  |
| H | 8.057235  | 3.104104   | 1.723300  |
| H | -6.627496 | 0.841092   | -3.428044 |
| H | -3.323750 | 5.111556   | -2.015178 |
| H | -2.441193 | 6.607099   | -2.303249 |
| H | -4.572402 | -3.126163  | 2.654162  |
| H | -6.113104 | -2.570708  | 4.505313  |
| H | -8.094566 | -1.120945  | 4.085423  |
| H | -8.520404 | -0.256715  | 1.790466  |
| H | -6.962801 | -0.821172  | -0.051551 |
| H | -5.445595 | -9.962452  | -0.049721 |
| H | -7.108399 | -9.623942  | 0.487201  |
| H | -6.821640 | -10.297296 | -1.151116 |
| H | -6.894649 | -5.812768  | -1.265346 |
| H | -5.267679 | -6.152545  | -1.808492 |
| H | -5.955752 | -4.794903  | 0.863952  |
| H | -4.330492 | -5.111921  | 0.283004  |
| H | -4.769087 | -3.665189  | -1.729197 |
| H | -6.366919 | -3.286135  | -1.107800 |
| H | -1.160759 | 6.937094   | -4.102528 |
| H | 0.604851  | 6.796800   | -4.197122 |
| H | 6.013595  | -4.303884  | 1.165224  |
| H | 6.854571  | -3.317232  | -0.059230 |
| H | 6.012986  | -4.808532  | -0.545147 |
| H | -0.153525 | 7.411639   | -2.702524 |
| H | 9.575947  | -1.697541  | 2.541646  |
| H | 8.410096  | -1.231912  | 4.676477  |
| H | 4.747037  | -0.554180  | 2.529987  |

|   |           |           |           |
|---|-----------|-----------|-----------|
| H | 3.432888  | -1.568993 | 4.154157  |
| H | 3.835678  | -1.873633 | 5.845555  |
| H | 4.682560  | 0.499657  | 6.045280  |
| H | 4.503238  | 0.685438  | 4.295241  |
| H | 9.975527  | -2.838743 | 0.514225  |
| H | 9.741156  | -1.170837 | -2.040613 |
| H | 11.107259 | -2.198249 | -1.649929 |
| H | 8.687037  | -3.817552 | -1.422198 |
| H | 10.050477 | -4.049889 | -2.493630 |
| H | 0.919880  | -1.989505 | 4.753792  |
| H | 1.369215  | -2.249570 | 6.435348  |
| H | -1.048104 | -2.560070 | 7.168246  |
| H | -2.199366 | -1.251666 | 6.944397  |
| H | 2.353245  | 0.061778  | 6.518122  |
| H | 1.919042  | 0.301746  | 4.829155  |
| H | -0.551310 | -0.086889 | 5.420259  |
| H | -0.026542 | -0.248799 | 7.091362  |
| H | 6.663996  | -2.581702 | -2.193871 |
| H | 7.547870  | -1.139272 | -2.652227 |
| H | 8.065144  | -3.914894 | -3.835917 |
| H | 9.004783  | -2.465620 | -4.154505 |
| H | -1.156915 | -3.054780 | 4.696522  |
| H | -2.818967 | -4.207249 | 6.229164  |
| H | -3.488250 | -3.919093 | 4.616384  |
| H | -3.951639 | -2.872104 | 5.969449  |
| H | 5.548087  | -1.022318 | -3.903707 |
| H | 6.719730  | -1.598559 | -5.084062 |
| H | 5.878536  | -3.968432 | -4.663235 |
| H | 4.717338  | -3.308571 | -3.514826 |
| H | 3.656741  | -1.951874 | -5.345661 |
| H | 3.613380  | -3.680020 | -5.717123 |
| H | 4.802624  | -2.634261 | -6.514946 |
| H | -2.277168 | -1.726509 | 4.486542  |
| H | 5.262279  | 0.082120  | -0.054514 |
| H | 6.410039  | -1.016542 | -0.791369 |
| H | 10.338233 | -1.101606 | 0.371808  |
| H | -6.333734 | -1.646800 | -3.644978 |
| H | -7.689332 | -1.910653 | -2.538113 |
| H | 0.863887  | 8.325163  | -0.714948 |
| H | 3.589586  | -4.638927 | -1.097766 |
| H | 3.350253  | -4.563538 | 0.660724  |
| H | 1.707345  | 4.982142  | -2.626216 |
| H | 1.139775  | 4.380893  | -4.201567 |

---

**PPCBMB** chloroform (*singlet*) B3LYP-6-31G\* E= -5347.969625 u.a.

---

|   | X        | Y         | Z         |
|---|----------|-----------|-----------|
| C | 5.825829 | -0.785299 | 2.540076  |
| C | 6.471440 | -1.027611 | 1.326499  |
| C | 7.835816 | -1.352744 | 1.306455  |
| C | 8.547181 | -1.423850 | 2.507459  |
| C | 7.899313 | -1.165215 | 3.713792  |
| C | 6.536368 | -0.843238 | 3.743206  |
| C | 5.714622 | -0.906628 | 0.017989  |
| C | 4.613591 | -1.902334 | -0.143244 |



|   |           |           |           |
|---|-----------|-----------|-----------|
| C | 3.178427  | -1.514464 | -0.358477 |
| C | 2.400050  | -2.897736 | -0.437247 |
| C | 3.521212  | -3.959142 | -0.244529 |
| N | 4.770213  | -3.203083 | -0.107953 |
| C | 2.748861  | -0.562149 | 0.764133  |
| C | 2.757028  | 0.767319  | 0.251982  |
| C | 2.967354  | 0.717990  | -1.183909 |
| C | 3.110178  | -0.629757 | -1.606509 |
| C | 2.551999  | -1.062686 | -2.820715 |
| C | 1.873593  | -0.102114 | -3.654849 |
| C | 1.766241  | 1.253484  | -3.271694 |
| C | 2.329097  | 1.683332  | -1.996820 |
| C | 1.927542  | 1.768611  | 0.797569  |
| C | 1.293172  | 2.736182  | -0.058628 |
| C | 1.529354  | 2.707284  | -1.439878 |
| C | 0.494669  | 3.143898  | -2.484007 |
| C | 0.577051  | 1.994042  | -3.500809 |
| C | 1.625161  | -3.104657 | -1.751593 |
| C | 1.791168  | -2.306433 | -2.877863 |
| C | 0.662092  | -2.100652 | -3.772593 |
| C | 0.720787  | -0.735542 | -4.261414 |
| C | -0.455801 | -0.004434 | -4.459506 |
| C | -0.535199 | 1.394938  | -4.079466 |
| C | -0.966401 | 3.404670  | -1.888768 |
| C | -1.117709 | 3.162610  | -0.376231 |
| C | -0.041193 | 2.977055  | 0.475037  |
| C | -0.212979 | 2.145287  | 1.659977  |
| C | 1.016844  | 1.405443  | 1.865747  |
| C | 0.981307  | 0.083780  | 2.330015  |
| C | 1.865240  | -0.928127 | 1.778392  |
| C | 1.118362  | -2.178211 | 1.687164  |
| C | 1.282232  | -3.042328 | 0.604367  |
| C | 0.143093  | -3.617394 | -0.021719 |
| C | 0.351533  | -3.669100 | -1.459086 |
| C | -0.752577 | -3.497943 | -2.321233 |
| C | -0.580354 | -2.687404 | -3.502354 |
| C | -1.806372 | -1.936254 | -3.705179 |
| C | -1.740947 | -0.621414 | -4.173464 |
| C | -2.598304 | 0.392184  | -3.602999 |
| C | -1.870193 | 1.640983  | -3.541921 |
| C | -2.079326 | 2.510435  | -2.467042 |
| C | -1.234758 | 4.849219  | -2.247541 |
| N | -0.292691 | 5.357321  | -2.990835 |
| C | 0.876378  | 4.491873  | -3.151574 |
| C | -2.744931 | -2.308424 | -2.652571 |
| C | -3.596893 | -1.336555 | -2.124859 |
| C | -3.489498 | 0.020764  | -2.577893 |
| C | -2.083236 | -3.286963 | -1.792061 |
| C | -2.285505 | -3.283638 | -0.403039 |
| C | -3.277253 | -2.394232 | 0.266124  |
| C | -4.018891 | -1.313215 | -0.687616 |
| C | -2.570741 | -1.820896 | 1.450826  |
| C | -2.658792 | -0.481314 | 1.820638  |
| C | -3.322473 | 0.495807  | 0.955887  |
| C | -3.895372 | 0.108983  | -0.260422 |
| C | -3.654631 | 0.895928  | -1.436092 |
| C | -1.159643 | -3.404660 | 0.469218  |
| C | -1.335956 | -2.531339 | 1.611379  |
| C | -0.213453 | -1.922000 | 2.193962  |
| C | -0.303922 | -0.540663 | 2.600338  |

|   |           |           |           |
|---|-----------|-----------|-----------|
| C | -1.495564 | 0.166541  | 2.410017  |
| C | -1.445906 | 1.535642  | 1.926264  |
| C | -2.556865 | 1.722682  | 1.025331  |
| C | -2.361204 | 2.516952  | -0.124961 |
| C | -2.929097 | 2.100220  | -1.390133 |
| C | -4.764659 | -2.407104 | 0.047189  |
| C | -5.333205 | -3.558793 | -0.779890 |
| C | -5.333314 | -4.882660 | -0.013434 |
| C | -5.868132 | -6.028135 | -0.868556 |
| C | -5.897213 | -7.349741 | -0.133682 |
| O | -6.356132 | -8.337430 | -0.932180 |
| C | -6.425190 | -9.641319 | -0.329229 |
| C | -2.410995 | 5.650513  | -1.777687 |
| C | -2.419056 | 5.859450  | -0.268922 |
| C | -1.282539 | 6.301696  | 0.421074  |
| C | -1.307035 | 6.353050  | 1.818858  |
| C | -2.460858 | 6.018521  | 2.518325  |
| C | -3.617502 | 5.625799  | 1.834363  |
| C | -3.579899 | 5.542414  | 0.440193  |
| O | -0.165044 | 6.570362  | -0.333266 |
| C | 0.792552  | 7.554972  | 0.102926  |
| C | 2.185058  | 6.945055  | 0.185291  |
| C | 2.333204  | 5.885175  | 1.280470  |
| C | 3.760006  | 5.340187  | 1.454095  |
| C | 4.352617  | 4.669833  | 0.207484  |
| C | 5.761987  | 4.095050  | 0.412659  |
| C | 5.865107  | 2.962514  | 1.442647  |
| C | 7.276160  | 2.372773  | 1.517054  |
| O | -4.710712 | 5.339879  | 2.601235  |
| C | -5.941221 | 5.059588  | 1.922962  |
| C | -6.020204 | 3.640783  | 1.350629  |
| C | -7.050259 | 3.558673  | 0.218906  |
| C | -7.186270 | 2.153026  | -0.365953 |
| C | -8.120842 | 2.091129  | -1.578960 |
| C | -8.309497 | 0.680667  | -2.156261 |
| C | -7.024443 | 0.056312  | -2.710850 |
| C | -7.239637 | -1.329356 | -3.320436 |
| C | -0.234773 | 6.729706  | -3.493855 |
| C | 6.007042  | -3.941721 | 0.120863  |
| O | 8.367543  | -1.600133 | 0.065642  |
| C | 9.754438  | -1.916261 | -0.072373 |
| C | 10.031198 | -2.101529 | -1.559067 |
| C | 9.306269  | -3.313080 | -2.199674 |
| C | 8.409381  | -2.974210 | -3.403934 |
| C | 7.198491  | -2.105509 | -3.044154 |
| C | 6.192311  | -1.867558 | -4.179178 |
| C | 5.284241  | -3.069706 | -4.463567 |
| C | 4.287120  | -2.803682 | -5.593099 |
| O | 6.004670  | -0.601315 | 4.976503  |
| C | 4.692033  | -0.030654 | 5.086586  |
| C | 3.579009  | -1.075145 | 5.128860  |
| C | 2.247115  | -0.449611 | 5.559122  |
| C | 1.110493  | -1.465752 | 5.713361  |
| C | -0.194582 | -0.810818 | 6.182978  |
| C | -1.342962 | -1.791147 | 6.464914  |
| C | -1.914186 | -2.483239 | 5.222319  |
| C | -3.076083 | -3.423885 | 5.548530  |
| C | -5.648331 | -2.011435 | 1.199069  |
| C | -6.773840 | -1.214673 | 0.967435  |
| C | -7.645916 | -0.894488 | 2.007109  |

|   |           |            |           |
|---|-----------|------------|-----------|
| C | -7.400949 | -1.369453  | 3.297715  |
| C | -6.284138 | -2.171766  | 3.536619  |
| C | -5.415772 | -2.491484  | 2.492276  |
| O | -5.560916 | -7.528667  | 1.019798  |
| H | -0.416037 | 6.627082   | 2.370871  |
| H | -2.478879 | 6.051695   | 3.602605  |
| H | -4.436001 | 5.191456   | -0.120262 |
| H | -5.038015 | 3.337106   | 0.972823  |
| H | -6.268974 | 2.932115   | 2.149561  |
| H | -6.716531 | 5.218006   | 2.676958  |
| H | -6.092418 | 5.808245   | 1.133319  |
| H | 0.486478  | 7.982114   | 1.061617  |
| H | 2.430814  | 6.518561   | -0.795188 |
| H | 2.896262  | 7.766318   | 0.354078  |
| H | 1.650548  | 5.056278   | 1.067160  |
| H | 2.009355  | 6.319568   | 2.237099  |
| H | -6.189544 | 1.788948   | -0.640205 |
| H | -7.551273 | 1.474744   | 0.415403  |
| H | -8.725389 | 0.022648   | -1.378054 |
| H | -9.063477 | 0.716595   | -2.955223 |
| H | -8.029733 | 3.908179   | 0.577487  |
| H | -6.755537 | 4.255703   | -0.580777 |
| H | -7.730605 | 2.752397   | -2.367007 |
| H | -9.102167 | 2.498253   | -1.296697 |
| H | 3.680241  | 3.873254   | -0.128339 |
| H | 4.396138  | 5.399266   | -0.612386 |
| H | 3.743047  | 4.617472   | 2.278971  |
| H | 4.426241  | 6.156220   | 1.773427  |
| H | -6.275191 | -0.017442  | -1.917329 |
| H | -7.921277 | -1.287608  | -4.178970 |
| H | 6.129970  | 3.720360   | -0.553418 |
| H | 6.447889  | 4.904659   | 0.705088  |
| H | 5.576363  | 3.331909   | 2.435120  |
| H | 5.141770  | 2.174278   | 1.191958  |
| H | 7.562492  | 1.913528   | 0.562598  |
| H | 7.351652  | 1.602594   | 2.289969  |
| H | 8.013338  | 3.154084   | 1.741999  |
| H | -6.589354 | 0.728355   | -3.463671 |
| H | -3.318527 | 5.105815   | -2.052614 |
| H | -2.437919 | 6.609198   | -2.302444 |
| H | -4.545172 | -3.109620  | 2.682690  |
| H | -6.084081 | -2.549914  | 4.535076  |
| H | -8.076462 | -1.116747  | 4.110158  |
| H | -8.515446 | -0.273364  | 1.809829  |
| H | -6.960335 | -0.841605  | -0.032867 |
| H | -5.432122 | -9.969370  | -0.011967 |
| H | -7.091990 | -9.628459  | 0.536598  |
| H | -6.816247 | -10.301653 | -1.102991 |
| H | -6.886664 | -5.817741  | -1.220953 |
| H | -5.263633 | -6.159434  | -1.775380 |
| H | -5.933933 | -4.794353  | 0.897706  |
| H | -4.311614 | -5.114212  | 0.308135  |
| H | -4.758439 | -3.672552  | -1.703106 |
| H | -6.354973 | -3.293845  | -1.078018 |
| H | -1.123808 | 6.954477   | -4.085671 |
| H | 0.645379  | 6.824051   | -4.128899 |
| H | 6.030456  | -4.300554  | 1.154873  |
| H | 6.869734  | -3.308220  | -0.067269 |
| H | 6.028326  | -4.798613  | -0.557038 |
| H | -0.159536 | 7.420454   | -2.651950 |

|   |           |           |           |
|---|-----------|-----------|-----------|
| H | 9.602513  | -1.670410 | 2.512363  |
| H | 8.445368  | -1.205158 | 4.650689  |
| H | 4.769181  | -0.544734 | 2.520238  |
| H | 3.464351  | -1.556438 | 4.149855  |
| H | 3.872601  | -1.857640 | 5.840718  |
| H | 4.716311  | 0.517390  | 6.033670  |
| H | 4.531258  | 0.700131  | 4.283986  |
| H | 9.982085  | -2.832430 | 0.490531  |
| H | 9.754516  | -1.171683 | -2.069829 |
| H | 11.116139 | -2.203745 | -1.676646 |
| H | 8.692345  | -3.814736 | -1.440810 |
| H | 10.051981 | -4.051887 | -2.515634 |
| H | 0.952840  | -1.979125 | 4.757740  |
| H | 1.410054  | -2.238074 | 6.437659  |
| H | -1.001058 | -2.553620 | 7.181536  |
| H | -2.156544 | -1.247377 | 6.966348  |
| H | 2.389771  | 0.075579  | 6.515218  |
| H | 1.949530  | 0.312877  | 4.827372  |
| H | -0.519351 | -0.080076 | 5.429958  |
| H | 0.014107  | -0.239129 | 7.098728  |
| H | 6.666345  | -2.582396 | -2.212924 |
| H | 7.554315  | -1.139834 | -2.665297 |
| H | 8.065160  | -3.914472 | -3.853871 |
| H | 9.005685  | -2.465793 | -4.175198 |
| H | -1.125223 | -3.044732 | 4.708931  |
| H | -2.769007 | -4.207978 | 6.252166  |
| H | -3.455065 | -3.917739 | 4.646457  |
| H | -3.909713 | -2.876815 | 6.006906  |
| H | 5.550976  | -1.016866 | -3.912428 |
| H | 6.726073  | -1.578880 | -5.096541 |
| H | 5.890666  | -3.953184 | -4.705347 |
| H | 4.729742  | -3.313184 | -3.546049 |
| H | 3.657469  | -1.939081 | -5.355986 |
| H | 3.625411  | -3.662119 | -5.754321 |
| H | 4.806446  | -2.596040 | -6.537006 |
| H | -2.252991 | -1.721429 | 4.509913  |
| H | 5.273596  | 0.087734  | -0.070210 |
| H | 6.418547  | -1.013286 | -0.807992 |
| H | 10.359102 | -1.098851 | 0.341366  |
| H | -6.290971 | -1.761813 | -3.656610 |
| H | -7.676780 | -2.017148 | -2.585757 |
| H | 0.771614  | 8.361171  | -0.640774 |
| H | 3.606906  | -4.632626 | -1.101750 |
| H | 3.369656  | -4.561184 | 0.656606  |
| H | 1.726161  | 4.970147  | -2.653505 |
| H | 1.107273  | 4.384689  | -4.214025 |

---

## References

(<sup>ii</sup>) Frisch, M. J.; Trucks, G. W.; Schlegel, H. B.; Scuseria, G. E.; Robb, M. A.; Cheeseman, J. R.; Scalmani, G.; Barone, V.; Mennucci, B.; Petersson, G. A. et al. *Gaussian 09*, Revision A.2; Gaussian, Inc.: Wallingford, CT, 2009.
